# 1 **Treatment with IFB-088 improves neuropathy in CMT1A** 2 **and CMT1B mice**

3  
4 Yunhong Bai,<sup>1</sup> Caroline Treins,<sup>2</sup> Vera G. Volpi,<sup>3</sup> Cristina Scapin,<sup>3</sup> Cinzia Ferri,<sup>3</sup> Rosa  
5 Mastrangelo,<sup>3</sup> Thierry Touvier,<sup>3</sup> Francesca Florio,<sup>3</sup> Francesca Bianchi,<sup>4</sup> Ubaldo Del Carro,<sup>4</sup>  
6 Frank F. Baas,<sup>5</sup> David Wang,<sup>1</sup> Pierre Miniou,<sup>2</sup> Philippe Guedat,<sup>3</sup> Michael E. Shy<sup>1,†</sup> and Maurizio  
7 D'Antonio<sup>3,†</sup>

8  
9 **† These authors contributed equally to the manuscript**

## 10 11 **Author affiliations:**

12 <sup>1</sup> Department of Neurology, Carver College of Medicine, University of Iowa, Iowa City, Iowa,  
13 IA 52242, USA

14 <sup>2</sup> InFlectis BioScience, 44300 Nantes, France

15 <sup>3</sup> Division of Genetics and Cell Biology, San Raffaele Scientific Institute DIBIT, 20132 Milano,  
16 Italy

17 <sup>4</sup> Division of Neuroscience, San Raffaele Scientific Institute DIBIT, 20132 Milano, Italy

18 <sup>5</sup> Department of Clinical Genetics, Leiden University Medical Center, Leiden, The Netherlands

19

## 20 **Author Emails:**

21 Yunhong Bai [yunhong-bai@uiowa.edu](mailto:yunhong-bai@uiowa.edu)

22 Caroline Treins [carolinetreins@inflectisbioscience.com](mailto:carolinetreins@inflectisbioscience.com)

23 Vera G Volpi [volpi.veragiulia@gmail.com](mailto:volpi.veragiulia@gmail.com)  
24 Cristina Scapin [scapin33@gmail.com](mailto:scapin33@gmail.com)  
25 Cinzia Ferri [ferri.cinzia@hsr.it](mailto:ferri.cinzia@hsr.it)  
26 Rosa Mastrangelo [mastrangelo.rosa@hsr.it](mailto:mastrangelo.rosa@hsr.it)  
27 Thierry Touvier [touvier.thierry@hsr.it](mailto:touvier.thierry@hsr.it)  
28 Francesca Florio [florio.francesca@hsr.it](mailto:florio.francesca@hsr.it)  
29 Francesca Bianchi [bianchi.francesca@hsr.it](mailto:bianchi.francesca@hsr.it)  
30 Ubaldo Del Carro [delcarro.ubaldo@hsr.it](mailto:delcarro.ubaldo@hsr.it)  
31 Frank F Baas [F.Baas@lumc.nl](mailto:F.Baas@lumc.nl)  
32 David Wang [david.wang2@uhhospitals.org](mailto:david.wang2@uhhospitals.org)  
33 Pierre Miniou [pierreminiou@inflectisbioscience.com](mailto:pierreminiou@inflectisbioscience.com)  
34 Philippe Guedat [philippeguedat@inflectisbioscience.com](mailto:philippeguedat@inflectisbioscience.com)  
35 Michael E Shy [michael-shy@uiowa.edu](mailto:michael-shy@uiowa.edu)  
36 Maurizio D'Antonio [dantonio.maurizio@hsr.it](mailto:dantonio.maurizio@hsr.it)

37

38 **Corresponding author:** Maurizio D'Antonio, PhD, [dantonio.maurizio@hsr.it](mailto:dantonio.maurizio@hsr.it)

39

## 40 **Abstract**

41 Charcot Marie Tooth diseases type 1A (CMT1A), caused by duplication of Peripheral Myelin  
42 Protein 22 (*PMP22*) gene, and CMT1B, caused by mutations in myelin protein zero (*MPZ*) gene  
43 are the two most common forms of demyelinating CMT (CMT1) and no treatments are available  
44 for either. Prior studies of the *Mpz*Ser63del mouse model of CMT1B have demonstrated that  
45 protein misfolding, endoplasmic reticulum (ER) retention and activation of the unfolded protein

46 response (UPR) contributed to the neuropathy. Heterozygous patients with an arginine to  
47 cysteine mutation in MPZ (*MPZR98C*) develop a severe infantile form of CMT1B which is  
48 modeled by *MpzR98C/+* mice that also show ER-stress and an activated UPR. C3-PMP22 mice  
49 are considered to effectively model CMT1A. Altered proteostasis, ER-stress and activation of the  
50 UPR have been demonstrated in mice carrying *Pmp22* mutations. To determine whether enabling  
51 the ER-stress/UPR and readjusting protein homeostasis would effectively treat these models of  
52 CMT1B and CMT1A we administered Sephin1/IFB-088/icerguestat, a UPR modulator which  
53 showed efficacy in the *MpzS63del* model of CMT1B, to heterozygous *MpzR98C* and C3-PMP22  
54 mice. Mice were analyzed by behavioral, neurophysiological, morphological and biochemical  
55 measures. Both *MpzR98C/+* and C3-PMP22 mice improved in motor function and  
56 neurophysiology. Myelination, as demonstrated by g-ratios and myelin thickness, improved in  
57 CMT1B and CMT1A mice and markers of UPR activation returned towards wild type values.  
58 Taken together our results demonstrate the capability of IFB-088 to treat a second mouse model  
59 of CMT1B and a mouse model of CMT1A, the most common form of CMT. Given the recent  
60 benefits of IFB-088 treatment in Amyotrophic Lateral Sclerosis and Multiple Sclerosis animal  
61 models, these data demonstrate its potential in managing UPR and ER-stress for multiple  
62 mutations in CMT1 as well as in other neurodegenerative diseases.

63

64

65 **Keywords:** Charcot Marie Tooth; neuropathy; proteostasis; UPR; IFB-088

66

67

68

## 69 **Introduction**

70 Charcot Marie Tooth (CMT) disease refers to heritable peripheral neuropathies, which are the  
71 most common genetic neuromuscular diseases, affecting 1:2500 individuals [60]. Autosomal  
72 dominant (AD) inheritance is the most common, followed by X-linked and autosomal recessive  
73 (AR) forms. Most forms of CMT are demyelinating while approximately one-third appear to be  
74 primary axonal disorders [18, 43]. CMT1A is the most common form, affecting approximately  
75 half of all patients with CMT [18], and is caused by a 1.4Mb duplication within chromosome  
76 17p11.2, in the region containing the peripheral myelin protein 22 (*PMP22*) gene [39, 63].  
77 CMT1B (caused by mutations in myelin protein zero (*MPZ*) gene, encoding for P0 protein) [26]  
78 is the second most frequent AD demyelinating form, encompassing around 5% of CMT cases  
79 [18]. At present there are no effective treatments to slow progression or improve neuropathy in  
80 patients with CMT1A or CMT1B.

81         80% of newly synthesized *PMP22* is rapidly degraded by the proteasome under normal  
82 conditions, with only 20% reaching the cell surface or myelin sheath [48]. Whether this ratio is  
83 altered when *PMP22* is over-expressed in CMT1A is unknown. Ordinarily, the maintenance of  
84 correct protein homeostasis is tightly controlled by protein quality control mechanisms [1]. The  
85 elevated protein expression associated with *PMP22* trisomy, in conjunction with the instability  
86 of the *PMP22* protein, impose a heavy burden on the endoplasmic reticulum (ER) protein quality  
87 control (ERQC) mechanisms [17, 35, 45, 57] . When these control mechanisms fail, stress  
88 responses are activated leading to protein-kinase RNA-like endoplasmic reticulum kinase (PERK)  
89 (one of the unfolded protein response (UPR) sensors) mediated phosphorylation of the alpha  
90 subunit of the eukaryotic translation initiation factor 2 (eIF2 $\alpha$ )[25]. This phosphorylation causes  
91 an attenuation of global protein synthesis which reduces protein overload in the ER while

92 allowing the translation of selected genes supporting stress recovery [38]. The extent to which  
93 these responses are activated in CMT1A is unclear, though there have been studies suggesting  
94 UPR activation in a CMT1A mouse model carrying seven copies of the human *PMP22* gene, the  
95 C22 mouse, which shows a severe dysmyelinating neuropathy [23], and in Trembler J (Tr<sup>J</sup>) mice  
96 [46], which are caused by a missense mutation in *Pmp22* [33].

97 Over 200 different mutations in *MPZ* cause neuropathy  
98 ([http://hihg.med.miami.edu/code/http/cmt/public\\_html/index.html#/](http://hihg.med.miami.edu/code/http/cmt/public_html/index.html#/)) and the disease  
99 mechanisms are largely unknown. One group of mutations presents clinically in infancy or early  
100 childhood, with very slow nerve conduction velocities (NCV), and dysmyelination  
101 morphologically. Another group of *MPZ* mutations does not present clinically until adulthood,  
102 with near normal NCV, and axonal damage but minimal demyelination morphologically  
103 (sometimes called CMT2I or CMT2J) [55]. Several *MPZ* mutations in these groups have been  
104 shown *in vitro* to cause the accumulation of the mutant protein within the ER, where it triggered  
105 ER stress and activated the UPR. These included *Mpz* S51ΔW57 [21], 506delT and 550del3insG  
106 [4, 32]. Moreover, two mouse models of CMT1B, the *Mpz*Ser63del and *Mpz*R98C mice [53, 56],  
107 demonstrated ER retention of the mutant protein and a canonical UPR. The compound IFB-088  
108 (icerguastat, also known as sephin1) was developed to prolong protein translation attenuation in  
109 response to stress by inhibiting eIF2α dephosphorylation to allow cells to restore cellular  
110 homeostasis [12]. Oral treatment with IFB-088 largely prevented the molecular, motor and  
111 morphological abnormalities of the neuropathy of *Mpz*Ser63del mice [12]. Whether treatment  
112 with IFB-088 is effective for only the Ser63del *MPZ* mutation is not known. This is an important  
113 question perhaps since as many as 40% of *MPZ* mutations have been recently shown to activate  
114 components of the UPR [4]. Accordingly, we elected to treat *Mpz*R98C/+ mice with IFB-088.

115 We also hypothesized that IFB-088 may have effects on CMT1A, because of the highly  
116 metastable nature of PMP22 and because of UPR activity in C22 and Tr<sup>l</sup> mice [23, 33]. We  
117 therefore chose to use IFB-088 to treat the C3-PMP22 mouse model of CMT1A. C3-PMP22  
118 mice, which carry 3-4 copies of the human *PMP22* gene, develop a slowly progressive  
119 dysmyelinating peripheral neuropathy that is thought to be an appropriate model of CMT1A [15,  
120 65]. Both CMT1B and CMT1A models were treated IFB-088, and evaluated by behavioral,  
121 neurophysiological, morphological and biochemical analysis.

122

## 123 **Materials and methods**

### 124 **Myelinating DRG explant cultures**

125 Dorsal-root-ganglia (DRG) were dissected from embryos at embryonic day 13.5 (E13.5) and  
126 plated singularly on collagen-coated coverslips as previously described [62]. Myelination was  
127 induced with 50 µg/ml ascorbic acid (Sigma Aldrich). Treatment with IFB-088 at the indicated  
128 concentration was applied for 2-week in parallel to the induction of myelination. Samples were  
129 then fixed and rat anti-MBP (1/5) [11] and rabbit anti-NF-H (1/1000, EMD Millipore) primary  
130 antibodies were added o/n at 4°C. The following day, DRGs were washed and FITC- or TRITC-  
131 conjugated secondary antibodies (1:200, Cappel) were added for 1h at room temperature.  
132 Specimen were incubated with DAPI (1:1000, SIGMA) and mounted with VectaShield (Vector  
133 Laboratories). 8-10 images were taken from each DRG using a fluorescence microscope (Leica  
134 DM5000) with a 10x objective, and the number of MBP+ internodes in each image was counted.

135

## 136 **Animal models**

137 All experiments involving animals were performed in accord with experimental protocols  
138 approved by the San Raffaele Scientific Institute and the University of Iowa Animal Care and  
139 Use Committee. *MpzS63del* transgenic mice [70] and *MpzR98C/+* knock-in mice [56] were  
140 maintained on the FVB/N background. C3-PMP22 transgenic mice [65] were obtained from the  
141 Amsterdam University Medical Center, Amsterdam, the Netherland. They were maintained on a  
142 C57BL/6J background. C3-PMP22 cohorts for this study were generated via *in vitro* fertilization  
143 following the protocol from the European Mouse Mutant Archive (EMMA) - mouse sperm  
144 cryopreservation protocol [61].

145

## 146 **Experimental design**

147 **C3-PMP22 study:** Starting from post-natal day (PND) 15, mice were administered via oral  
148 gavage twice a day (bis in die (*b.i.d.*)). WT mice were administered with vehicle (saline solution:  
149 NaCl 0.9%) *b.i.d.* and C3-PMP22 mice were administered with vehicle *b.i.d.* or IFB-088  
150 0.5mg/kg *b.i.d.* or 1mg/kg *b.i.d.* After 10-week treatment period, mice were tested for treadmill  
151 and grip-strength. After 12-week treatment period, mice were analysed for neurophysiology and  
152 sacrificed for morphology, and biochemistry. Each experiment was performed by a different  
153 operator, completely blinded to genotype and treatment.

154 ***MpzR98C/+* study:** WT and *MpzR98C/+* mice were administrated via oral gavage twice a day  
155 with vehicle (saline solution: NaCl 0.9%) or IFB-088 1mg/kg starting from PND30. After 90  
156 days (PND120) and 150 days (PND180) of treatment, mice were tested for rotarod, grip-strength  
157 and electrophysiology. Animals were then sacrificed for morphology, protein, and molecular  
158 expression analysis with the evaluator blinded to genotype and treatment.

159

## 160 **Treadmill**

161 C3-PMP22 mice were evaluated on treadmills after 10-week treatment. A grid that delivers a  
162 mild electric shock is used to motivate the animal to run. On the first day, mice are trained for  
163 5mins, starting at 6cm/s; the speed is slowly increased to 10cm/s. The treadmill has a 5°  
164 inclination and delivers a 0.2mA shock. The following day, measurement is performed: initial  
165 speed is set up at 10cm/s, increased of 2cm/s every minute. The test ends at exhaustion, when the  
166 mouse spends more than three seconds on the electric shock grid. Distance covered, speed and  
167 number of shocks were recorded.

168

## 169 **Rotarod**

170 *MpzR98C/+* mice were evaluated at PND120 and PND180 on an accelerating rotating rod. Mice  
171 underwent three training trials on an IITC Life Science Roto-Rod (Series 8) with a ramp speed  
172 from 2 to 20rpm in 300s. A 1h rest was given after each trial and it was considered valid if the  
173 animals ran forward on the rod for at least 10s. The next day the latency to fall was recorded  
174 three times following the above-mentioned protocol for each time point and mouse. The average  
175 was used as the outcome value.

## 176 **Grip strength**

### 177 **C3-PMP22 study**

178 The muscular strength was evaluated using a GSM Grip-Strength Meter (Ugo basile). This test  
179 measures the muscular strength using an isometric dynamometer connected to a grid. Once the  
180 animal is holding the grid with its forepaws it is slowly moved backwards pulling the tail, until it



181 releases the grip. The dynamometer records the maximal force exerted. Each mouse is tested six  
182 times.

### 183 ***MpzR98C/+* study**

184 The strength of all four limbs of WT and *MpzR98C/+* mice was evaluated using an automated  
185 Grip Strength Meter (Columbus Instruments). Within 1 week after training (10 practice trials  
186 using a mesh bar), the peak force exerted by each individual mouse was measured 10 times  
187 consecutively with 10s resting periods and averaged.

188

### 189 **Electrophysiological analysis**

#### 190 **C3-PMP22 study**

191 The electrophysiological evaluation was performed with a specific EMG system (NeuroMep  
192 Micro, Neurosoft, Russia), as previously described [5]. Mice were anesthetized with  
193 trichloroethanol, 0.02ml/g of body weight, and placed under a heating lamp to maintain constant  
194 body temperature. Sciatic nerve conduction velocity was obtained by stimulating the nerve with  
195 steel monopolar needle electrodes. A pair of stimulating electrodes was inserted subcutaneously  
196 near the nerve at the ankle. A second pair of electrodes was placed at the sciatic notch to obtain  
197 two distinct sites of stimulation, proximal and distal along the nerve. Compound motor action  
198 potential (CMAP), was recorded with a pair of needle electrodes; the active electrode was  
199 inserted in muscles in the middle of the paw, whereas the reference was placed in the skin  
200 between the first and second digit. Sciatic nerve F-wave latency measurement was obtained by  
201 stimulating the nerve at the ankle and recording the responses in the paw muscle, with the same  
202 electrodes employed for the NCV study.

#### 203 ***MpzR98C/+* study**

204 Mice were analyzed as above with the following differences. Anesthesia was with  
205 Ketamine/Xylazine (87.5mg/kg ketamine, 12.5mg/kg Xylazine). For sensory  
206 electrophysiological testing, one pair of loop electrodes were put 0.2cm and 0.7cm from the tail  
207 base as recording and reference electrodes. A second air was placed on the tail 3.7cm (cathode)  
208 and 4.2cm (anode) from the base. A ground electrode was put at the middle of two pairs loop  
209 electrodes. The distal pair was used for stimulation.

210

### 211 **Morphological analysis**

212 Mice were sacrificed at the indicated time points and sciatic and femoral nerves were dissected.  
213 Semi-thin section and electron microscope analyses were performed as previously described [14].  
214 The number of myelinated axons in C3-PMP22 mice was counted blind to genotype and  
215 treatment from quadriceps femoral nerve semi-thin sections (0.5-1 $\mu$ m thick) stained with toluidine  
216 blue, on images taken with a 100x objective, after whole nerve reconstruction. Similarly, for  
217 *MpzR98C/+* mice, semithin sections were examined under a 63x objective. Each consecutive  
218 field was captured using a digital camera and whole nerve reconstruction was made by using  
219 photoshop software. In both studies, g-ratio analysis (axonal diameter/fiber diameter) and the  
220 size distribution of myelinated fibers (based on axons diameter) were also measured for all fibers.  
221 4-8 mice per genotype and condition were analysed. Ultrathin sections (90nm thick) from  
222 femoral nerves were cut using an ultracut ultramicrotome, stained with uranyl acetate and lead  
223 citrate and examined by transmission electron microscopy (TEM) (Zeiss Leo912 Omega or  
224 JEOL 1230, Peabody, MA).

225

### 226 **Protein extraction and Western Blotting**

227 Mice were sacrificed at the indicated time points and sciatic nerves were dissected and  
228 immediately frozen in liquid nitrogen. Protein extraction was performed as previously described  
229 [52, 71]. The following antibodies were used: rabbit anti-Grp78/Bip (1:1000, Novus Biological,  
230 NB300-520 or 1:1000, Abcam, ab21685), rabbit anti-Phospho-eIF2 $\alpha$  (Ser51) (D9G8) XP<sup>TM</sup> and  
231 eIF2 $\alpha$  (D7D3) XP<sup>TM</sup> (1:2000, Cell Signalling, #3398 and #5324); chicken anti-P0 (PZO, Aves);  
232 rabbit anti-PMP22 (AB211052 or AB 861220; ABCAM); mouse anti- $\beta$ -tubulin (1:1000, T4026,  
233 Sigma); mouse anti-Gapdh (1:1000, Millipore, MAB374); rabbit anti c-Jun (1:1000, ABCAM,  
234 #32137). Peroxidase-conjugated secondary antibodies (anti-rabbit HRP, DAKO, P0448; anti-  
235 chicken IgG-peroxidase, Sigma) were visualized using Amersham ECL or ECL Prime 225  
236 reagent (GE Healthcare) for high-sensitivity chemiluminescent protein detection with UVItec gel  
237 analysis systems or using enhanced chemiluminescence (ECL) reagents (Bio-Rad) with  
238 autoradiography film (Kodak Scientific Imaging Film, Blue XB). Total proteins were visualized  
239 via staining with Coomassie Brilliant blue R250 staining solution (Bio-Rad). Densitometric  
240 quantification was performed with ImageJ.

241

## 242 **RNA isolation and Real-time PCR analysis**

### 243 **C3-PMP22 study**

244 Total RNA was extracted using TRIzol (Roche Diagnostic GmbH, Germany) and reverse  
245 transcription was performed as described previously [10] Quantitative RT-PCR was performed  
246 according to manufacturer's instructions (TaqMan, PE Applied Biosystems Instruments) on an  
247 ABI PRISM 7700 sequence detection system (Applied Biosystems Instruments). Normalization  
248 was performed using 18S rRNA as reference gene. Target and reference gene PCR amplification  
249 were performed in separate tubes with Assay on Demand<sup>TM</sup> (Applied Biosystems Instruments):

250 18S assay Hs99999901\_s1; Ddit3/Chop, Mm00492097\_m1; Xbp-1s assay, Mm03464496\_m1;  
251 Hspa5/BiP assay, Mm00517691\_m1; ATF4 assay, Mm00515324\_m1; Gadd34/PPP1r15a assay,  
252 Mm00435119\_m1.

### 253 ***MpzR98C/+* study**

254 Total RNA was extracted using NucleoSpin RNA Plus Kit (740984.50 Macherey-Nagel GmbH  
255 & Co. KG, Germany). Complementary DNA was prepared with SuperScript® III First Strand  
256 Synthesis SuperMix (11752-050, Invitrogen), and samples were analyzed as triplicates on a  
257 StepOnePlus Real-Time PCR System (Applied Biosystems) detection system using Fast SYBR®  
258 Green (4385612, Applied Biosystems). All samples were normalized to Ppia as an endogenous  
259 control and expressed relative (threshold cycle (Ct) and  $2(-\Delta\Delta Ct)$ ) to vehicle sciatic nerve data.

260 The list of primers is below:

261 CHOP forward 5'-CTGCCTTTCACCTTGGAGAC-3'

262 CHOP Reverse 5'-CGTTTCCTGGGGATGAGATA-3'

263 BiP forward 5'-CATGGTTCTCACTAAAATGAAAGG-3'

264 BiP Reverse 5'-GCTGGTACAGTAACAACACTG-3'

265 Xbp1-s forward 5'-GAGTCCGCAGCAGGTG-3'

266 Xbp1-s reverse 5'-GTGTCAGAGTCCATGGGA-3'

267 Ppia forward 5'-AGCACTGGAGAGAAAGGATT-3'

268 Ppia reverse 5'-ATTATGGCGTGTAAGTCACCA-3'

269

### 270 **IFB-088 pharmacokinetic study**

271 Nine males and nine females C57BL/6J (three animals per sampling time) were treated with a  
272 single intraperitoneal administration of IFB-088 at 4 mg/kg. 10min, 30min, 1h, 2h, 4h, 6h, 8h

273 after administration, animals were briefly anaesthetized with Isoflurane and blood was collected.

274 IFB-088 was extracted from plasma samples and measured by LC-MS/MS.

275

## 276 **Statistical analysis**

277 Group sizes were pre-determined with the G\*Power v3.1.9.4 software (Heinrich-Heine-

278 Universität Düsseldorf), to detect differences of at least 1,25 standard deviations between groups,

279 with 80% power an alpha error of 0.05. Data were analysed with GraphPad Prism7.02 software.

280 For behaviour and electrophysiology, outliers have been identified using Grubbs's test and data

281 tested for normality and variance homogeneity. Statistical difference between mean values

282 between two groups were tested using Student's T-test or Mann-Whitney. When multiple groups

283 were compared, one-way ANOVA analysis followed by Friedman's, Tukey's or Dunnett's

284 multiple comparison test and Kruskal-Wallis analysis followed by Dunn's multiple comparison

285 test were used, as indicated in the Figure legends.

286

## 287 **Results**

### 288 ***MpzR98C/+* DRG Schwann cell co-cultures show improved myelination**

#### 289 **following treatment with IFB-088**

290 Explanted dorsal root ganglia (DRGs) from wild type (WT) and *MpzR98C/+* mice were

291 plated and grown under myelinating conditions [12]. Similar to what was found in explants from

292 *MpzSer63del* mice [12] the percentage of myelinated internodes was reduced in explant cultures

293 of *MpzR98C/+* mice compared to explants from WT animals (Additional File 1: Supplementary

294 Fig. 1 a-b), although higher than in *MpzS63del* co-cultures. *MpzR98C/+* co-cultures were then

295 treated with escalating doses (50, 75, 100 and 125nM) of IFB-088 and assessed for myelination.  
296 The number of myelinated internodes increased with all doses compared to untreated co-cultures  
297 with a maximum effect at 100nM IFB-088 (Fig. 1a, Fig. 1b), similarly to what observed in  
298 *MpzS63del* explants (Additional File 1: Supplementary Fig. 1c-d and [12]).

299

### 300 **IFB-088 treatment improves grip strength, rotarod performance and nerve** 301 **conduction velocities in *MpzR98C/+* mice**

302 Western blot (WB) on sciatic nerve lysates from 1-month old *MpzR98C/+* mice, which  
303 already manifested signs of the disease [56], showed a clear increase of P-eIF2 $\alpha$  (Fig. 1c),  
304 indicating activation of the PERK pathway of the UPR. We treated 1-month old WT and  
305 *MpzR98C/+* mice with either vehicle or 1mg/kg of IFB-088 twice a day (the dosage shown to be  
306 effective in *MpzS63del* mice) [12] by oral gavage. Throughout the treatment mice were regularly  
307 weighted. As previously reported for *MpzS63del* mice [12], IFB-088 treatment does not impact  
308 body weight (Additional File 1: Supplementary Fig. 2).

309 After 3- and 5-month of treatment mice were tested by Rotarod, Grip Strength, and by  
310 neurophysiology. The mice were then sacrificed for morphological and biochemical analysis (Fig.  
311 1d and Additional File 1: Supplementary Fig. 3a). As previously observed [12], IFB-088  
312 treatment did not impact WT mice motor function or neurophysiological parameters (not shown).  
313 *MpzR98C/+* mice had reduced grip strength compared to WT animals at PND120 (Additional  
314 File 1: Supplementary Fig. 3b) and PND180 (Fig. 1e). After 5-month treatment *MpzR98C/+*  
315 mice showed significant improvement on grip strength compared to vehicle treated animals (Fig.  
316 1e). Similar improvements were obtained for male and female mice (not shown). We evaluated  
317 the mice on the same day for their ability to maintain balance on an accelerating Rotarod. We

318 confirmed a significant reduction in the latency to fall in PND120 and PND180 *MpzR98C/+*  
319 mice as compared to WT mice (Additional File 1: Supplementary Fig. 3c and Fig. 1f) [52, 56].  
320 *MpzR98C/+* mice treated with IFB-088 for 5 months, but not 3 months, were able to maintain  
321 their balance significantly longer than untreated animals, approaching latencies obtained by WT  
322 animals (Fig. 1f and Additional File 1: Supplementary Fig. 3c).

323 Neurophysiological testing confirmed marked slowing in motor nerve conduction  
324 velocity (MNCV) and sensory nerve conduction velocity (SNCV) in *MpzR98C/+* mice at  
325 PND120 (Additional File 1: Supplementary Fig. 3d-e) and PND180 (Fig. 1g-h) [52, 56]. No  
326 significant differences in compound muscle action potential (CMAP) and sensory nerve action  
327 potential (SNAP) amplitudes were observed between WT and *MpzR98C/+* mice (not shown). 5-  
328 month treatment with IFB-088 significantly improved both MNCV and SNCV of *MpzR98C/+*  
329 mice (Fig. 1g-h). The positive impact of IFB-088 treatment on *MpzR98C/+* SNCV was also  
330 observed after 3-month of treatment (Additional File 1: Supplementary Fig. 3e).

331

332 **IFB-088 treatment improves nerve morphology, partially reduces ER-stress**  
333 **and corrects the expression of Schwann cell differentiation marker in**  
334 ***MpzR98C/+* mice**

335 On morphometric analysis, nerves from *MpzR98C/+* mice demonstrated marked  
336 abnormal myelin as attested by reduced myelin thickness and increased g-ratio (Fig. 2). After 5-  
337 month IFB-088 treatment, transverse sections of quadriceps femoral nerves from *MpzR98C/+*  
338 mice showed increased myelin thickness and reduced g-ratio (ratio between axon diameter and  
339 axon + myelin diameter) compared to vehicle treated nerves (Fig. 2a-e). Detailed ultrastructural

340 analysis performed via EM, confirmed the thin myelin sheath surrounding *MpzR98C/+* axons,  
341 which appears thicker after IFB-088 treatment (Fig. 2f).

342 We previously showed that *MpzR98C/+* mice have increased expression of ER-  
343 chaperones immunoglobulin heavy chain-binding protein (BiP) and glucose regulated protein 94  
344 (Grp94), as part of an ER-stress response. We also demonstrated an altered phenotype of  
345 myelinating Schwann cells in which the expression of c-Jun, a transcription factor that inhibits  
346 myelination [50], was increased [56]. Therefore, we investigated the expression of mRNA (Fig.  
347 3a-c), and protein levels (Fig. 3d-f) in a variety of genes known to play a role in these processes.  
348 As previously described, *MpzR98C/+* mice presented an increase of the expression of ER-stress  
349 and UPR markers *BiP*, C/EBP homologous protein (*Chop*) and spliced X-box-binding protein-1  
350 (*Xbp1s*) and a higher level of c-Jun compared to WT mice (Fig. 3). IFB-088 treatment reduced  
351 the levels of *Chop* and *BiP* mRNA and BiP protein, whereas the levels of *Xbp1s* were unchanged  
352 (Fig. 3a-e). Finally, c-Jun protein levels were significantly reduced by IFB-088 (Fig. 3d, Fig. 3f).  
353 Altogether our data suggest that treatment with IFB-088 reduced stress levels in *MpzR98C/+*  
354 nerves, allowing Schwann cell to differentiate and myelinate more efficiently.

355

### 356 **Nerves from the CMT1A mouse model C3-PMPP22 show alteration of myelin** 357 **proteins stoichiometry and activation of ER-stress pathways**

358 To address whether IFB-088 could be a viable treatment also for CMT1A we took  
359 advantage of the C3-PMP22 mouse (supposed to carry 3-4 extra copies of PMP22) [65]. WB  
360 performed of protein extract from C3-PMP22 nerves at 4-month demonstrated reduced  
361 expression of P0 (MPZ), the most abundant myelin protein, but similar PMP22 levels to WT



362 nerves. As a result, there was a relative overexpression of PMP22 protein in C3-PMP22 nerves  
363 (Fig. 4a).

364 To test whether the excess of PMP22 would lead to proteostatic stress we measured the  
365 mRNA levels for a subset of well know UPR markers. This revealed a small increase in the  
366 expression of the general ER-stress marker *BiP* (downstream of the ATF6 arm of the UPR), and  
367 a significant upregulation of *Chop* and of the Protein Phosphatase 1 Regulatory Subunit 15A  
368 (*Gadd34/Ppp1r15a*), two downstream targets of the PERK/P-eIF2 $\alpha$  pathway, whereas *Xbp1s*, a  
369 target of the inositol requiring enzyme 1 (IRE1) arm, and the activating transcription factor 4  
370 (*Atf4*) were not increased (Fig. 4b). WB for BiP and P-eIF2 $\alpha$  confirmed the activation of stress  
371 pathways in these nerves (Fig. 4c-d). These results showed that C3-PMP22 mice present an  
372 alteration of myelin proteins stoichiometry associated with the activation of ER-stress pathways.

373

### 374 **IFB-088 treatment improves motor capacity and MNCV in CMT1A mice**

375 We treated C3-PMP22 mice with either 0.5mg/kg or with 1mg/kg of IFB-088 twice a  
376 day by oral gavage. The treatment started at PND15, when the disease is already manifested as  
377 shown by severe myelination defects, altered myelin proteins stoichiometry and activation of  
378 ER-stress pathways (Additional File 1: Supplementary Fig. 4).

379 After 10-week of treatment C3-PMP22 mice were tested for motor capacity and, after 12-  
380 week of treatment, for neurophysiology. They were then sacrificed for morphological and  
381 biochemical analysis (Fig. 5a). Treadmill analysis showed that C3-PMP22 mice were severely  
382 impaired compared to WT mice (Fig. 5b). IFB-088 treatment at 1mg/kg *b.i.d.* showed a small but  
383 significant improvement as compared to vehicle treated mice (Fig. 5b). However, the operator  
384 (blind to treatment) noticed that all C3-PMP22 male mice ran very poorly. Therefore, the mice

385 were stratified by gender. C3-PMP22 female mice treated with IFB-088 1mg/kg *b.i.d.* had a  
386 significant amelioration in motor capacity, that increased 2-fold compared to vehicle treated  
387 mice (Fig. 5c). Male mice also had a comparable 2-fold improvement with the same dosage, but  
388 the baseline was very poor (Fig. 5d).

389 Grip strength confirmed that C3-PMP22 mice were impaired compared to WT mice. IFB-  
390 088 treatment did not improve strength when the mice were analysed altogether (Fig. 5e).  
391 However, when divided by gender, C3-PMP22 male mice showed a trend towards improvement  
392 at 0.5mg/kg *b.i.d.* which became significant for the 1mg/kg *b.i.d.* of IFB-088 (Fig. 5g). This  
393 positive impact was not seen in C3-PMP22 female mice (Fig. 5f).

394 Finally, we assessed a series of neurophysiological parameters (MNCV, F-wave latency,  
395 CMAP) which revealed a severe impairment in C3-PMP22 mice as compared to WT controls  
396 (Fig. 5h and not shown), as previously reported [65]. Treatment with both 0.5 and 1mg/kg *b.i.d.*  
397 IFB-088 showed a modest improvement in MNCV after 12-week treatment, that reached  
398 significance for the 0.5mg/kg *b.i.d.* dose (Fig. 5h). Stratification per gender revealed that the  
399 improvement was restricted to female mice, for which the amelioration was statistically  
400 significant at both dosages (Fig. 5i). Only IFB-088 treated C3-PMP22 female mice displayed  
401 MNCV over 20m/s. On the contrary in C3-PMP22 male mice there was no improvement, and  
402 actually the 1mg/kg *b.i.d.* dose showed a small worsening that, although marginal, reached  
403 statistical significance (Fig. 5j). None of the other neurophysiological parameters measured were  
404 improved by the treatment (not shown).

405

406 **IFB-088 treatment improves nerve morphology, reduces ER-stress level and**  
407 **partially readjust myelin proteins stoichiometry in CMT1A mice**

408 Previous analysis suggested that C3-PMP22 mice motor nerves were more affected than  
 409 sensory nerves [24, 65]. Therefore, we dissected quadriceps femoral nerve, predominantly motor,  
 410 and sciatic nerve which is a mixed nerve with many sensory axons. Transverse sections of sciatic  
 411 nerves showed an increase in the myelination of large calibre fibres in mice treated with IFB-088.  
 412 In both male and female C3-PMP22 nerves large calibre axons were almost invariably  
 413 amyelinated (where by amyelinated we refer to any axon with diameter >1µM, which is in  
 414 contact with a Schwann cell but not myelinated by it). After IFB-088 treatment many of the large  
 415 axons were myelinated (Additional File 1: Supplementary Fig. 5). Similarly, in untreated femoral  
 416 nerves most large calibre axons were amyelinated whereas small calibre axons tended to be  
 417 hypermyelinated (Fig. 6a-b). As in sciatic nerves, treatment with IFB-088 partially corrected  
 418 these abnormalities with myelin wrapping appearing around large axons at both 0.5 and 1mg/kg  
 419 *b.i.d.* of IFB-088 (Fig. 6a-b). No gross differences were detected between female and male  
 420 nerves (Additional File 1: Supplementary Fig. 5 and Fig. 6a-b).

421 Cross sections of the entire femoral nerve from 2-4 mice per condition for both genders  
 422 were reconstructed and, for each nerve, the entire number of myelinated or amyelinated axons  
 423 was counted (Table 1).

424  
 425 **Table 1 Percentage of amyelinated (amongst axons with diameter larger than 1 µm) and myelinated fibres.**  
 426 Data were expressed in percentage of fibers as mean ± SEM. *n*=5-8 mice per condition. \**P*<0.05, \*\**P*<0.01 by One-  
 427 way ANOVA with Tukey post-hoc test; §*P*<0.05 by Student's T-test vs C3-PMP22 vehicle.

428

|                            |          | WT Vehicle<br><i>b.i.d.</i> | C3 Vehicle<br><i>b.i.d.</i> | C3 IFB-088<br>0.5 mg/kg <i>b.i.d.</i> | C3 IFB-088<br>1 mg/kg <i>b.i.d.</i> |
|----------------------------|----------|-----------------------------|-----------------------------|---------------------------------------|-------------------------------------|
| % of amyelinated<br>fibers | All mice | 0.033 ± 0.08                | 27.2 ± 2.4                  | <b>19.9 ± 1.3**</b>                   | 21.9 ± 1.4                          |
|                            | Females  | 0.1 ± 0.06                  | 29.9 ± 1                    | 19.8 ± 2.5 <sup>§</sup>               | 23.5 ± 0.3                          |
|                            | Males    | 0                           | 25.4 ± 3.9                  | 20 ± 1.2                              | 20.3 ± 2.7                          |
| % of myelinated<br>fibers  | All mice | 100 ± 0.026                 | 72.8 ± 2.4                  | <b>80 ± 1.3*</b>                      | 78.1 ± 1.4                          |
|                            | Females  | 99.8 ± 0.061                | 70.1 ± 1                    | 80.1 ± 2.5 <sup>§</sup>               | 76.5 ± 0.3                          |
|                            | Males    | 100                         | 74.6 ± 3.9                  | 80 ± 1.2                              | 79.7 ± 2.7                          |

429  
430 This analysis identified  $27.2 \pm 2.4\%$  amyelinated large axons in C3-PMP22 vehicle treated  
431 nerves. Treatment with IFB-088 0.5 or 1mg/kg *b.i.d.* reduced the percentages to  $19.9 \pm 1.3\%$  and  
432  $21.9 \pm 1.4\%$ , representing a 27% and 20% improvement respectively. The number of amyelinated  
433 axons was slightly greater for females ( $29.9 \pm 1\%$ ) than for males ( $25.4 \pm 3.9\%$ ) which also showed  
434 more variability. In males the treatment with IFB-088 0.5 or 1mg/kg *b.i.d.* had a similar effect,  
435 reducing amyelinated axons by roughly 20%, whereas in females the IFB-088 0.5mg/kg *b.i.d.*  
436 treatment reduced amyelinated axons by 34%, while the IFB-088 1mg/kg *b.i.d.* treatment  
437 reduced it by 20% (Table1).

438 Analysis of myelin thickness by g-ratio showed a remarkable difference in the scatter plot  
439 between WT and C3-PMP22 mice. The slope for C3-PMP22 mice was much steeper, mostly due  
440 to the large group of hypermyelinated small axons (diameter  $< 1 \mu\text{M}$ ) accompanied by the almost  
441 complete absence of myelination in axons larger than  $5 \mu\text{M}$  (Fig. 6c). Indeed, whereas there were  
442 no myelinated axons smaller than  $1 \mu\text{M}$  in WT nerves, 4.4% of the axons myelinated in  
443 quadriceps femoral nerves from C3-PMP22 mice had a diameter lower than  $1 \mu\text{M}$ , indicating an  
444 aberrant hypermyelinating phenotype. Conversely, 45.9% of myelinated axons in nerves from  
445 WT mice had a diameter larger than  $5 \mu\text{M}$ , a percentage that was reduced to only 3.9% of the  
446 myelinated axons in C3-PMP22 mice (Fig. 6d). IFB-088 treatment partially corrected these  
447 abnormalities. The percentage of myelinated axons smaller than  $1 \mu\text{M}$  was reduced to 2.1% and  
448 2.3% by the IFB-088 0.5mg/kg *b.i.d.* and 1mg/kg *b.i.d.* treatment respectively, whereas the  
449 percentage of myelinated axons with a diameter larger than  $5 \mu\text{M}$  rose to 12.4% and 8.5%  
450 respectively (Fig. 6d). Stratification of male and female mice showed that the amelioration in the  
451 hypermyelinating phenotype in small calibre axons was exclusively present in females, as visible

452 in the scatterplots (Additional File 1: Supplementary Fig. 6a-b), even though the overall g-ratio  
453 in vehicle treated C3-PMP22 males and females was virtually identical ( $0.61\pm 0.013$  in males vs  
454  $0.61\pm 0.015$  in females). In both C3-PMP22 males and females, IFB-088 treatment increases the  
455 number of myelinated axons with diameter larger than  $5\mu\text{M}$  (Additional File 1: Supplementary  
456 Fig. 6c-d).

457 Detailed analysis by transmission electron microscopy (TEM) on transverse sections  
458 from quadriceps femoral nerves confirmed that in C3-PMP22 nerves, small diameter axons (even  
459 smaller than  $1\mu\text{m}$ ) were surrounded by an abnormally thick myelin sheath. In female nerves,  
460 treatment with IFB-088 almost completely corrected this phenotype (Fig. 6e and Additional File  
461 1: Supplementary Fig. 6a). At the same time, large calibre axons were either not myelinated or  
462 presented a very thin layer of myelin (probably corresponding to 2-3 wraps of Schwann cell  
463 membrane). Treatment with IFB-088 allowed myelination to proceed also in large calibre fibres  
464 (Fig. 6f). Importantly, this newly formed myelin appeared to have a proper structure and  
465 compaction/periodicity.

466 As previously shown, C3-PMP22 nerves presented increase expression of the ER-stress  
467 marker BiP and an unbalance between PMP22 and P0 protein levels. We therefore wanted to test  
468 whether IFB-088 treatment could correct these features. WB analysis showed that treatment with  
469 both dosages of IFB-088 normalized BiP expression to WT levels (Fig. 7a-b), and that there was  
470 a partial (although not complete) readjustment of the PMP22/P0 protein ratio (Fig. 7a, Fig. 7c),  
471 suggesting an overall improvement in nerve proteostasis.

472

## 473 **Discussion**

474 The maintenance of correct protein homeostasis (proteostasis) is tightly controlled by protein  
475 quality control (PQC) mechanisms [1]. Myelinating Schwann cells, that need to synthesize large  
476 amounts of lipids and proteins, are particularly susceptible to failures in PQC. Alterations in  
477 proteostasis, deficits in PQC and the activation of ER-stress/UPR have been implicated in several  
478 myelin disorders [69]. Here we show that the small molecule IFB-088 is able to readjust protein  
479 homeostasis and to ameliorate disease features in two models of demyelinating CMT1, the  
480 *MpzR98C/+* (CMT1B) and the C3-PMP22 (CMT1A) mice.

481

### 482 **IFB-088 improves disease features in CMT1B mice**

483 We demonstrated that IFB-088 effectively mitigates the peripheral neuropathy in *MpzR98C/+*  
484 mice, using *in vitro* as well as *in vivo* studies. *In vitro*, IFB-088 enhanced myelination in  
485 *MpzR98C/+* DRGs explant co-cultures. *In vivo*, 5-month IFB-088 treatment improved motor  
486 performance, nerve conduction velocity, and peripheral nerve morphology of *MpzR98C/+* mice.  
487 Our prior studies demonstrated that ER-chaperones such as BiP and the transcription factor  
488 CHOP are upregulated in *MpzR98C/+* mice consistent with their ER-stress response. We also  
489 previously demonstrated that the transcription factor c-Jun, which inhibits PNS myelination [50],  
490 was upregulated in *MpzR98C/+* mice [56]. We now show that treatment with IFB-088 reduced  
491 ER-stress and decreased the expression of the negative regulator of myelination c-Jun.

492 IFB-088 treatment effects, while significant in *MpzR98C/+* mice, were less pronounced  
493 than those observed in *MpzSer63del* animals [12]. Morphological as well as molecular deficits  
494 were often prevented in the *MpzSer63del* mice [12] but only showed improvement in the  
495 *MpzR98C/+*. We posit several reasons for these differences. First, *MpzR98C/+* mice may be  
496 considered a “more authentic disease model” than the *MpzSer63del* animals, and this may

497 contribute to the different responses to treatment between the two models. The *MpzR98C/+* mice  
498 have had the mutation “knocked in” to the endogenous mouse *Mpz* allele [56]. Alternatively, the  
499 *MpzSer63del* mice are transgenic animals and still retain two WT *Mpz* alleles in addition to the  
500 *MpzSer63del* expressing transgene [70]. Thus, *MpzSer63del* mice have two copies of WT *Mpz* as  
501 opposed to the one *MpzR98C/+* mice to generate the normal protein. Secondly, the R98C *MPZ*  
502 neuropathy in humans is more severe than that caused by Ser63del *MPZ*. Patients with R98C  
503 *MPZ* (also called R69C by an earlier numbering system) have a dysmyelinating neuropathy and  
504 present with delayed developmental milestones, often not walking independently until after 2  
505 years of age. Affected patients may require walkers or wheelchairs for ambulation prior to  
506 reaching adulthood, and typically have MNCV < 10 m/s [3, 55]. Patients with the Ser63del *MPZ*  
507 mutation typically reach developmental milestones on time, walk independently by a year of age  
508 and only slowly develop symptoms over the first two decades of life. They have not required  
509 more than ankle foot orthotics to ambulate even in adulthood [41]. In humans *MPZS63del*  
510 MNCV are in the 20-30m/s range, similar to what is observed in patients with CMT1A [41].  
511 Thus, clinically, the Ser63del *MPZ* mutation is considered to be a demyelinating rather than a  
512 dysmyelinating neuropathy. Taken together these data suggest the *MpzR98C* mouse model  
513 causes a more severe neuropathy, that would be expected to be more difficult to reverse than the  
514 neuropathy caused by the Ser63del *Mpz* mutation.

515         How alleviating ER-stress improves the neuropathy caused by the R98C and Ser63del  
516 *MPZ* mutations remains an important issue. It is unlikely that augmenting UPR activity improves  
517 myelination by allowing R98C P0 to be transported to and inserted into PNS myelin. Introducing  
518 a cysteine into the P0 extracellular domain at codon 98 would be predicted to disrupt the di-  
519 sulfide bridge between existing cysteines at codons 50 and 127 [59]. This would in turn disrupt

520 the secondary and tertiary structures of the extracellular domain that are necessary to create P0  
521 tetramers in cis and trans to compact myelin [59], as already elegantly shown for the *MpzS63C*  
522 mutation [2, 70]. We believe it more likely that treatment benefits from IFB-088 occur by  
523 facilitating the Schwann cells ability to degrade the R98C P0 as well as transport WT P0 to  
524 myelin. Myelinating Schwann cells generate very large amounts of proteins and lipids to form  
525 and maintain the myelin sheath [42, 44]. Processing and properly folding P0 glycoprotein in the  
526 ER is particularly demanding as P0 is, by far, the major PNS myelin protein, comprising  
527 approximately 50% of all PNS myelin proteins [22] and 2% of all Schwann cell transcripts  
528 during the peak of myelination [36]. Folding and post-translationally processing P0 by ERQC  
529 pathways is a major undertaking for the ER, even when the protein is in its WT form [13]. The  
530 task is increased when a mutation such as R98C makes folding the protein more difficult.  
531 Schwann cells typically target misfolded proteins for degradation, through ubiquitination and  
532 proteasomal processing. Both protein degradation and proteasome function have been shown to  
533 be impaired in *MpzSer63del* mice [67, 68] and this is likely to be the case with *MpzR98C/+* mice  
534 as well. We predict that IFB-088-mediated translational attenuation through persistent  
535 phosphorylation of eIF2 $\alpha$ , will better enable Schwann cells to target R98C P0 to the proteasome,  
536 readjusting protein homeostasis as shown in *MpzSer63del* mice [11, 12]. In support of this  
537 hypothesis, it has been recently shown that promoting degradation by stimulating the proteasome  
538 ameliorates proteostasis and improves the phenotype of *MpzSer63del* mice [66]. We have  
539 previously shown that UPR activation causes *MpzR98C* and *MpzS63del* Schwann cells to enter a  
540 limited differentiation state in part by upregulating c-Jun expression; c-Jun, a transcription factor,  
541 negatively regulates myelination [50] [16]. As a result of this inhibition, myelin protein  
542 expression, including P0, decreases so that there is less mutant P0 for the ER to process [56].



543 IFB-088 treatment reduces the expression of the UPR marker BiP in *Mpz*R98C/+ mice,  
544 suggesting a reduction of ER-stress upon treatment. In addition, IFB-088 treatment decreases c-  
545 Jun expression and increases peripheral nerve myelination suggesting that inhibition of  
546 myelination is lifted. Restoring the Schwann cell phenotype will enable more WT P0 from the  
547 normal allele to reach myelin and contribute to clinical improvement. Supporting this  
548 explanation is the fact that we have recently demonstrated that patients who are haploinsufficient  
549 of *MPZ* have only a mild, late onset neuropathy, much milder than the neuropathy caused by  
550 R98C or Ser63del *MPZ* mutations [28].

551

### 552 **C3-PMP22 mice show altered proteostasis**

553 The overexpression of PMP22 in animal models is sufficient to cause neuropathy, suggesting  
554 that increased dosage of PMP22 is the main contributing factor in CMT1A pathology [29, 58].  
555 How the extra copy of *PMP22* causes disease is not fully understood, but studies in rodent  
556 models as well as in CMT1A patient derived fibroblast show that PMP22 can form cytosolic  
557 aggregates accompanied by reduced proteasomal activity, which may ultimately lead to  
558 cytotoxicity [17, 35, 45], PMP22 is a highly metastable protein, with more than 80% of newly  
559 synthesized PMP22 rapidly degraded by the proteasome, via ER-associated degradation (ERAD)  
560 [48, 49]. Recent *in vitro* work suggested that in normal condition, the levels of expression of  
561 PMP22 are close to the saturation capacity of the ERQC systems, and that overexpression of  
562 PMP22 leads to a disproportionate increase in misfolding and mis-trafficking [40]. Accordingly,  
563 examination of sciatic nerve from C22 mice, which show a severe dysmyelinating neuropathy,  
564 revealed increased expression of UPR markers such as BiP and CHOP [23]. In human, levels of  
565 PMP22 protein in CMT1A patient skin biopsies are elevated, even though the levels are more

566 variable than in non-CMT1A samples [31, 37]. High levels of PMP22 protein have also been  
567 reported in sural nerve biopsies from CMT1A patients [19, 64]. Although the exact mechanism  
568 underlying the pathogenicity associated with expression of third copy of *PMP22* is not yet  
569 clearly defined, it is well established that a correct stoichiometry of PMP22 protein is required to  
570 maintain compact myelin integrity [27, 30]. Correction of PMP22 expression level reverses  
571 demyelination phenotype in a transgenic animal model [54] and the relevance of reducing  
572 PMP22 expression has been acknowledged as one potential therapeutic approach for CMT1A  
573 [47]. Recently, several approaches aimed at reducing PMP22 mRNA expression, such as anti-  
574 sense oligonucleotides (ASO), siRNA and AAV2/9-mediated shRNA targeting PMP22 have  
575 been successfully tested in murine models [6, 7, 20, 73], but their translation to humans still  
576 poses several hurdles.

577         We reasoned that a pharmacologic approach like IFB-088 aimed at attenuating general  
578 protein translation, thus reducing also PMP22 levels, would currently represent a more viable  
579 option than gene therapies. For this study we used the C3-PMP22 mice, that carry 3-4 copies of  
580 the human *PMP22* gene, and that is thought to represent the more appropriate model to study  
581 CMT1A, as compared to C22 mice (carrying 7-8 copies) [65]. We showed that in C3-PMP22  
582 mice PMP22 overexpression results in the activation of the stress sensor BiP and of the PERK/P-  
583 eIF2 $\alpha$  pathway of the UPR, which supports the idea that activation of a stress response could be  
584 a contributing factor in CMT1A pathogenesis.

585

### 586 **IFB-088 treatment improves disease features in CMT1A mice**

587 Treatment with IFB-088 improved motor capacity, neurophysiology, peripheral nerve  
588 morphology, and partially readjusted both myelin protein stoichiometry and stress levels in C3-

589 PMP22 CMT1A mice. Importantly the treatment was started at PND15, when morphological  
590 deficits are already evident and ER-stress already activated, indicating that the treatment is  
591 ameliorating the disease and not simply preventing it. Intriguingly, some of these improvements  
592 were more prominent (treadmill) or present exclusively (neurophysiology) in females, whereas  
593 the improvement in dysmyelination was detectable in both sex although, again, some  
594 morphological parameters were ameliorated more in females than in males. The reasons for these  
595 differences are not clear. We ruled out a difference in IFB-088 exposure in males and females, as,  
596 in C57BL/6J mice, the same background as the C3-PMP22, no difference in term of IFB-088  
597 pharmacokinetic profile was observed (Additional File 1: Supplementary Fig. 7). Moreover, we  
598 did not detect significant gender differences in the response to treatment in *MpzR98C/+* mice  
599 (this study), nor in *MpzS63del* mice [12]. These results suggest that the difference may be more  
600 specific to the C3-PMP22 model itself. Of note, differences in motor capacity between genders  
601 have already been observed in different experimental setting in C3-PMP22 mice (F. Baas,  
602 *unpublished*) and in rotarod in the C22 model, with males performing significantly worse than  
603 females [51].

604 Neurophysiology analysis revealed an amelioration in nerve conduction velocity  
605 exclusively in females. The strong neurophysiological impairment in C3-PMP22 mice was  
606 accompanied by a complex and severe dysmyelinating phenotype, characterized by  
607 hypermyelination of small fibers and almost complete amyelination of large fibers, consistent  
608 with previous reports [65]. While myelination of large fibers improved almost equally in males  
609 and females after treatment with IFB-088, small fibers hypermyelination was more efficiently  
610 corrected in females. Whether this difference in morphological rescue is sufficient to explain the

611 discrepancy in NCV after treatment remains unclear however as the speed of NCV depends  
612 predominantly on large diameter fibers [34].

613         The dysmyelinating phenotype in C3-PMP22 mice was accompanied by an increase in  
614 the levels of the ER-stress marker BiP and of P-eIF2 $\alpha$ . Conversely, *Xbp1s* levels did not change  
615 significantly between WT and C3-PMP22 nerves, indicating that, unlike the CMT1B models  
616 *MpzR98C/+* and *MpzS63del*, not all the UPR pathways were activated by PMP22 overexpression.  
617 This difference is likely related to different mechanisms of stress activation in the two models:  
618 whereas R98C and Ser63del P0 are misfolded proteins retained in the ER [53, 56, 70] where they  
619 activate a canonical UPR, overexpression of PMP22 is thought to overwhelm the ERAD-  
620 proteasome system, and the activation of ER-stress is likely a secondary event. In this respect it  
621 has been shown that ERAD impairment in Schwann cells results in ER-stress activation [68, 72].  
622 We hypothesize that by prolonging the phosphorylation of eIF2 $\alpha$ , IFB-088 attenuates the  
623 translational of highly expressed myelin proteins including PMP22. As a result, stress levels  
624 were restored towards WT levels in treated C3-PMP22 mice, and there was a partial  
625 readjustment of protein stoichiometry in nerves from both male and female mice.

626         Despite these very promising results, the C3-PMP22 was only partially improved, and not  
627 fully rescued, probably because, as for *MPZR98C/+* mice, the dysmyelinating phenotype of these  
628 mice is very severe to start with. Several questions remain to be answered, including whether a  
629 prolonged treatment beyond 4-month of age would further improve the phenotype, and whether a  
630 treatment initiated in adult mice would still provide benefits. Moreover, it should be noted that  
631 while the C3-PMP22 mouse represents a good model of CMT1A, currently there is no authentic  
632 animal model for this disease, as all available models express extra copies of the *PMP22* gene  
633 but without replicating the 1.4Mb duplication found in humans.

634 In summary, we have demonstrated that IFB-088 treatment improved the neuropathy in  
635 *MpzR98C/+* mice, a CMT1B mouse model, and in C3-PMP22 mice, a CMT1A mouse model.  
636 This is the second example of IFB-088's ability to improve the neuropathy in a mouse model of  
637 CMT1B. We have identified many additional mutations in *MPZ* that activate the UPR [4] and  
638 expect that IFB-088 may prove beneficial in many of these patients. In addition, our study  
639 confirms a role of ER-stress in the pathogenesis of CMT1A and demonstrate the ability of IFB-  
640 088 to assist the ER-stress response to the over-expression of PMP22 and potentially treat  
641 patients with CMT1A. Thus, IFB-088, which completed successfully phase I clinical trial,  
642 represents a new and promising therapeutic option for CMT1A and CMT1B. Due to his mode of  
643 action, IFB-088 has the unique potential to provide benefits to different CMT subtypes caused by  
644 different gene defects. Moreover, the benefits of IFB-088 have been also demonstrated in  
645 Amyotrophic Lateral Sclerosis and in Multiple Sclerosis models [8, 9, 12], suggesting that  
646 managing UPR and ER-stress are promising strategies for multiple neurodegenerative diseases.

647  
648 **Abbreviations:** AD = autosomal dominant; AR = autosomal recessive; ASO = anti-sense  
649 oligonucleotides; ATF4 = activating transcription factor 4; BiP = immunoglobulin heavy chain-  
650 binding protein; CHOP = C/EBP homologous protein; CMT = Charcot Marie Tooth; CMAP =  
651 compound muscle action potential; DRG = dorsal root ganglia; eIF2 $\alpha$  = alpha subunit of the  
652 eukaryotic translation initiation factor 2; ER = endoplasmic reticulum; ERAD = ER-associated  
653 degradation; ERQC = endoplasmic reticulum protein quality control; Grp94 = glucose regulated  
654 protein 94; IRE1 = inositol requiring enzyme 1; MBP = myelin binding protein; MPZ = myelin  
655 protein zero; MNCV = motor nerve conduction velocity; NCV = nerve conduction velocity; NF  
656 = neurofilament; PERK = protein-kinase RNA-like endoplasmic reticulum kinase; PMP22 =

657 peripheral myelin protein 22; PND = post-natal day; PPP1R15A = Protein Phosphatase 1  
658 Regulatory Subunit 15A; PQC = protein quality control; SNAP = sensory nerve action potential;  
659 SNCV = sensory nerve conduction velocity; UPR = unfolded protein response; Tr<sup>J</sup> = Trembler J;  
660 TEM = transmission electron microscopy; WB = western blot; WT= wild type; XBP1 = X-box-  
661 binding protein-1.

662

663

## 664 **Declarations**

## 665 **Availability of data and materials**

666 The data that support the findings of this study are available from the corresponding author, upon  
667 reasonable request.

668

## 669 **Competing interests**

670 P.G., P.M. and C.T. are full-time employees and stockholders of InFlectis BioScience. M.D. acts  
671 as a Scientific Advisory Board member for InFlectis BioScience.

672

## 673 **Funding**

674 This work was funded by InFlectis BioScience.

675

## 676 **Authors' contributions**

677 M.D., M.E.S., P.G., P.M., C.T. contributed to the study conception and design. F.B. provided the  
678 C3-PMP22 mouse model. R.M. performed the myelinating DRG explant cultures. Y.B. and DW

679 performed the study in the *MpzR98C/+* mouse model. V.G.V., C.S., C.F., R.M., T.T., F.F.,  
680 performed the study in the C3-PMP22 mouse model. F.B., U.D. performed the  
681 neurophysiological evaluation of the C3-PMP22 mice. M.D., M.E.S. and C.T. wrote the  
682 manuscript. All authors commented on previous versions of the manuscript. All authors read and  
683 approved the final manuscript.

684

## 685 **Acknowledgements**

686 We thank the Charcot-Marie-Tooth Association for their continuous support. We are grateful to  
687 Dr. Patrizia D'Adamo and the Mouse Behavior Facility at IRCCS Ospedale San Raffaele. Part of  
688 this work was carried out in ALEMBIC, an advanced microscopy laboratory established by  
689 IRCCS Ospedale San Raffaele and Università Vita-Salute San Raffaele. M.D. is supported by  
690 Fondazione Telethon (GGP19099), CMTA (Charcot-Marie-Tooth Association, USA) and  
691 CMTRF (Charcot-Marie-Tooth Research Foundation).

692

693 **Additional file 1:** Supplementary figures S1 - S7.

694

695

## 696 **Figure legends**

697

698 **Figure 1: IFB-088 improves myelination in DRG explants, motor function and nerve**  
699 **conduction velocity from *MpzR98C/+* mice.** Dorsal root ganglia (DRG) were dissected from  
700 embryos (E13.5) of *MpzR98C/+* mice. The myelination process was induced with ascorbic acid.

701 After 2-week of treatment with vehicle or the indicated concentration of IFB-088, the DRGs  
702 were fixed and nuclei visualized by DAPI staining; axons and myelin were visualized by  
703 immunostaining with neurofilament antibody (NF) and with myelin basic protein (MBP)  
704 antibodies respectively. (a) Representative pictures. (b) Number of myelinated internodes per  
705 field in *MpzR98C/+* DRG explant cultures treated with vehicle or the indicated concentration of  
706 IFB-088 for 2 weeks. Mean  $\pm$ SEM.  $n=3$  independent experiments.  $*P<0.05$  One-way ANOVA  
707 followed by Friedman's test. (c) Representative western blot (WB) for P-eIF2 $\alpha$  and tubulin on  
708 sciatic nerve protein extracts from 1-month-old WT and *MpzR98C/+* mice. (d) Diagram of the  
709 treatment strategy. 30-day-old WT and *MpzR98C/+* mice were orally administered with vehicle  
710 or IFB-088 1mg/kg *b.i.d.* for 5-month. (e) Four limb grip strength max values average of 10 trials.  
711 Data were expressed in grams (g) as mean  $\pm$ SEM.  $n=15-26$  mice per condition. (f) Rotarod  
712 analysis. Data are expressed in seconds (s) as mean  $\pm$ SEM.  $n=15-26$  mice per condition. (g)  
713 Motor nerve conduction velocity (MNCV). Data are expressed in meter/second (m/s) as mean  
714  $\pm$ SEM.  $n=15-27$  mice per condition. (h) Sensory nerve conduction velocity (SNCV). Data are  
715 expressed in meter/second (m/s) as mean  $\pm$ SEM.  $n=15-26$  mice per condition.  $**P<0.01$ ;  
716  $***P<0.001$ ,  $****P<0.0001$  by Student's T-test;  $###P<0.001$ ,  $####P<0.0001$  by Mann-  
717 Whitney.

718

719 **Figure 2: IFB-088 treatment improves *MpzR98C/+* mice quadriceps femoral nerve**  
720 **morphology.** (a) Toluidine blue stained semithin sections of quadriceps femoral nerve from  
721 *MpzR98C/+* mice treated with vehicle *b.i.d.* or IFB-088 1mg/kg *b.i.d.* for 5 months. Arrows  
722 illustrate myelinated axons. Scale bar, 20 $\mu$ m. (b) Quadriceps femoral nerve g-ratios from  
723 *MpzR98C/+* mice treated with vehicle *b.i.d.* or IFB-088 1mg/kg *b.i.d.* for 5 months. Data are



724 expressed as mean  $\pm$ SEM.  $n=4$  mice per condition.  $*P<0.05$  by Student's T-test. (c) Scatter plot  
725 of quadriceps femoral nerve g-ratios toward axon diameter from *MpzR98C/+* mice treated with  
726 vehicle *b.i.d.* or IFB-088 1mg/kg *b.i.d.*  $n=4$  mice per condition. (d) Myelin thickness of  
727 quadriceps femoral nerve from *MpzR98C/+* mice treated with vehicle *b.i.d.* or IFB-088 1mg/kg  
728 *b.i.d.* for 5 months. Data are expressed in  $\mu\text{m}$  as mean  $\pm$ SEM.  $n=4$  mice per condition.  $*P<0.05$   
729 by Student's T-test. (e) Scatter plot of quadriceps femoral nerve myelin thickness toward axon  
730 diameter from *MpzR98C/+* mice treated with vehicle *b.i.d.* or IFB-088 1mg/kg *b.i.d.*  $n=4$  mice  
731 per condition. (f) Ultrathin sections of quadriceps femoral nerve from WT mice treated with  
732 vehicle *b.i.d.* and from *MpzR98C/+* mice treated with vehicle *b.i.d.* or IFB-088 1mg/kg *b.i.d.* for  
733 5 months. Lower panels are higher magnification images of upper panels. Scale bar  $1\mu\text{m}$  for top  
734 panels, and 500nm for bottom panels.

735  
736 **Figure 3: IFB-088 treatment reduces ER stress and Schwann cells differentiation markers**  
737 **expression in *MpzR98C/+* sciatic nerve.** Evaluation of mRNA (a-c) and protein levels (d-f) on  
738 sciatic nerve samples from WT and *MpzR98C/+* mice treated with vehicle *b.i.d.* or IFB-088  
739 1mg/kg *b.i.d.* for 5 months. mRNA relative levels of *Bip* (a), *Chop* (b) and *Xbp1s* (c) determined  
740 by qRT-PCR.  $n=4$  per condition.  $\#P<0.05$  by Mann-Whitney. (d) Western blot images for BiP  
741 and c-Jun. Quantification relative to tubulin for BiP (e), and c-Jun (f).  $n=2-5$  per condition.  
742  $*P<0.05$ ,  $**P<0.01$  by Student's T-test.

743  
744 **Figure 4: C3-PMP22 mice show a relative overexpression of PMP22 associated with**  
745 **expression of ER stress/UPR markers.** (a) Evaluation of PMP22, P0 and GAPDH protein  
746 levels by WB in sciatic nerve protein lysates from 4-month-old WT and C3-PMP22 (C3) mice.

747 Top: Representative picture. Bottom: Quantification of the PMP22/P0 protein ratio.  $n=3$  per  
748 condition.  $*P<0.05$  by Student's T-test. (b) Evaluation of *Bip*, *Chop*, *Xbp1s*, *Atf4* and  
749 *Gadd34/Ppp1r15a* mRNA levels by qRT-PCR on sciatic nerve samples from 4-month-old WT  
750 and C3-PMP22 (C3) mice.  $n=4$  per condition.  $\#P<0.05$  Mann Whitney. (c) Evaluation of BiP  
751 and tubulin protein levels by WB in sciatic nerve protein lysates from 4-month-old WT and C3-  
752 PMP22 (C3) mice. Top: Representative picture. Bottom: Quantification relative to tubulin.  $n=6$   
753 per condition. Student's T-test. (d) Evaluation of eIF2 $\alpha$  phosphorylation level and tubulin  
754 protein level by WB in sciatic nerve protein lysates from 1-month-old WT and C3-PMP22 (C3)  
755 mice. Top: Representative picture. Bottom: quantification of eiF2 $\alpha$  phosphorylation level  
756 relative to tubulin.  $n=6$  per condition. Student's T-test.

757  
758 **Figure 5: IFB-088 treatment improves motor function and nerve conduction velocity in C3-**  
759 **PMP22 mice.** (a) Diagram of the treatment strategy. 15-day-old WT and C3-PMP22 (C3) mice  
760 were orally administered with vehicle *b.i.d.* or IFB-088 at 0.5 or 1mg/kg *b.i.d.* for 12 weeks. (b)  
761 Treadmill analysis performed after 10-week of treatment. Data from males and females  
762 expressed in meter (m) as mean  $\pm$  SEM.  $n=14-22$  mice per condition. (c) Data from females.  
763  $n=8-10$  mice per condition. (d) Data from males.  $n=6-13$  mice per condition. (e) Forepaws grip  
764 strength average of 6 trials performed after 10-week of treatment. Data were expressed in pull  
765 force (grams) as mean  $\pm$  SEM.  $n=14-22$  mice per condition. (f) Data from females.  $n=8-10$  mice  
766 per condition. (g) Data from males.  $n=6-13$  mice per condition. (h) Motor nerve conduction  
767 velocity (MNCV) performed after 12-week of treatment. Data from males and females expressed  
768 in meter/second (m/s) as mean  $\pm$ SEM.  $n=14-21$  mice per condition. (i) Data from females.  $n=8-$   
769 10 mice per condition. (j) Data from males.  $n=6-12$  mice per condition.  $*P<0.05$ ;  $**P<0.01$ ;

770 \*\*\*\* $P < 0.0001$  by Student's T-test. # $P < 0.05$ ; ### $P < 0.001$ ; #### $P < 0.0001$  by Mann-Whitney.  
771 & $P < 0.05$ ; && $P < 0.01$  by One-Way ANOVA followed by Dunnett's test. \$ $P < 0.05$ ; \$\$ $P < 0.01$ ;  
772 \$\$\$ $P < 0.001$  by Kruskal-Wallis followed by Dunn's test.

773

774 **Figure 6: IFB-088 treatment improves C3-PMP22 mice quadriceps femoral nerve**

775 **morphology.** Toluidine blue stained semithin sections of quadriceps femoral nerve from (a)

776 female and (b) male WT mice treated with vehicle *b.i.d.* and C3-PMP22 (C3) mice treated with

777 vehicle *b.i.d.* or IFB-088 at 0.5 or 1mg/kg *b.i.d.* for 12 weeks. Scale bar, 10 $\mu$ m. (c) Scatter plot

778 of quadriceps femoral nerve g-ratios from WT mice treated with vehicle *b.i.d.* and C3-PMP22

779 (C3) mice treated with vehicle *b.i.d.* or IFB-088 at 0.5 or 1mg/kg *b.i.d.* Note the "cloud" of axons

780 with diameter lower than 1 $\mu$ m present only in C3-PMP22 nerves (untreated and treated) and the

781 appearance of a considerable number of myelinated axons larger than 5-6 $\mu$ m in IFB-088 treated

782 C3-PMP22 nerves.  $n=5-8$  nerves per condition. (d) Percentage of myelinated axons per axons

783 size.  $n=5-8$  nerves per condition. (e and f) TEM analysis of quadriceps femoral nerve from C3-

784 PMP22 (C3) mice treated with vehicle *b.i.d.* or IFB-088 at 1mg/kg *b.i.d.* (e) In C3-PMP22

785 vehicle treated nerves, small calibre axons are abnormally hypermyelinated (black dotted arrows).

786 Treatment with IFB-088 results in normal looking myelin in axons larger than 1 $\mu$ m (red arrows)

787 or in almost no myelin in smaller axons (blue large arrows). (f) In C3-PMP22 vehicle treated

788 nerves large calibre axons are basically amyelinated or with only a very thin layer of myelin (left

789 panel). After treatment with IFB-088 (right panel), a subgroup of large calibre axons showed a

790 properly compacted (albeit still rather thin) myelin sheath. A side by side comparison of

791 myelination in two axons with similar calibre is shown in the lower panel.

792

793 **Figure 7: IFB-088 treatment improves PMP22 stoichiometry in C3-PMP22 mice peripheral**  
794 **nerves and reduces ER stress.** Evaluation of PMP22, P0 and BiP protein levels by WB in  
795 sciatic nerve protein lysates from WT mice treated with vehicle *b.i.d.* and C3-PMP22 (C3) mice  
796 treated with vehicle *b.i.d.* or IFB-088 at 0.5 or 1mg/kg *b.i.d.* (a) Representative picture. Three  
797 representative samples per condition out of five/six are shown. (b) Quantification of BiP protein  
798 level. (c) Quantification of the PMP22/P0 protein ratio. \* $P < 0.05$ ; \*\* $P < 0.01$ ; \*\*\*\* $P < 0.0001$  by  
799 Student's T-test.

800

## 801 **References**

- 802 1 Anelli T, Sitia R (2008) Protein quality control in the early secretory pathway. The EMBO  
803 journal 27: 315-327 Doi 10.1038/sj.emboj.7601974
- 804 2 Avila RL, D'Antonio M, Bachi A, Inouye H, Feltri ML, Wrabetz L, Kirschner DA (2010) P0  
805 (protein zero) mutation S34C underlies instability of internodal myelin in S63C mice. The  
806 Journal of biological chemistry 285: 42001-42012 Doi 10.1074/jbc.M110.166967
- 807 3 Bai Y, Ianokova E, Pu Q, Ghandour K, Levinson R, Martin JJ, Ceuterick-de Groote C,  
808 Mazanec R, Seeman P, Shy ME et al (2006) Effect of an R69C mutation in the myelin  
809 protein zero gene on myelination and ion channel subtypes. Archives of neurology 63:  
810 1787-1794 Doi 10.1001/archneur.63.12.1787
- 811 4 Bai Y, Wu X, Brennan KM, Wang DS, D'Antonio M, Moran J, Svaren J, Shy ME (2018)  
812 Myelin protein zero mutations and the unfolded protein response in Charcot Marie  
813 Tooth disease type 1B. Ann Clin Transl Neurol 5: 445-455 Doi 10.1002/acn3.543
- 814 5 Biffi A, De Palma M, Quattrini A, Del Carro U, Amadio S, Visigalli I, Sessa M, Fasano S,  
815 Brambilla R, Marchesini S et al (2004) Correction of metachromatic leukodystrophy in  
816 the mouse model by transplantation of genetically modified hematopoietic stem cells. J  
817 Clin Invest 113: 1118-1129 Doi 10.1172/JCI19205
- 818 6 Boutary S, Caillaud M, El Madani M, Vallat JM, Loisel-Duwattez J, Rouyer A, Richard L,  
819 Gracia C, Urbinati G, Desmaele D et al (2021) Squalenoyl siRNA PMP22 nanoparticles are  
820 effective in treating mouse models of Charcot-Marie-Tooth disease type 1 A. Commun  
821 Biol 4: 317 Doi 10.1038/s42003-021-01839-2
- 822 7 Boutary S, Echaniz-Laguna A, Adams D, Loisel-Duwattez J, Schumacher M, Massaad C,  
823 Massaad-Massade L (2021) Treating PMP22 gene duplication-related Charcot-Marie-  
824 Tooth disease: the past, the present and the future. Translational research : the journal  
825 of laboratory and clinical medicine 227: 100-111 Doi 10.1016/j.trsl.2020.07.006

- 826 8 Chen Y, Kunjamma RB, Weiner M, Chan JR, Popko B (2021) Prolonging the integrated  
827 stress response enhances CNS remyelination in an inflammatory environment. *Elife* 10:  
828 Doi 10.7554/eLife.65469
- 829 9 Chen Y, Podojil JR, Kunjamma RB, Jones J, Weiner M, Lin W, Miller SD, Popko B (2019)  
830 Sephin1, which prolongs the integrated stress response, is a promising therapeutic for  
831 multiple sclerosis. *Brain* 142: 344-361 Doi 10.1093/brain/awy322
- 832 10 D'Antonio M, Michalovich D, Paterson M, Droggiti A, Woodhoo A, Mirsky R, Jessen KR  
833 (2006) Gene profiling and bioinformatic analysis of Schwann cell embryonic  
834 development and myelination. *Glia* 53: 501-515
- 835 11 D'Antonio M, Musner N, Scapin C, Ungaro D, Del Carro U, Ron D, Feltri ML, Wrabetz L  
836 (2013) Resetting translational homeostasis restores myelination in Charcot-Marie-Tooth  
837 disease type 1B mice. *J Exp Med* 210: 821-838 Doi 10.1084/jem.20122005
- 838 12 Das I, Krzyzosiak A, Schneider K, Wrabetz L, D'Antonio M, Barry N, Sigurdardottir A,  
839 Bertolotti A (2015) Preventing proteostasis diseases by selective inhibition of a  
840 phosphatase regulatory subunit. *Science* 348: 239-242 Doi 10.1126/science.aaa4484
- 841 13 Ellgaard L, Helenius A (2003) Quality control in the endoplasmic reticulum. *Nature*  
842 *reviews Molecular cell biology* 4: 181-191 Doi 10.1038/nrm1052
- 843 14 Ferri C, Quattrini A, D'Antonio M (2018) Electron Microscopy for the Analysis of  
844 Peripheral Nerve Myelin. *Methods Mol Biol* 1791: 3-13 Doi 10.1007/978-1-4939-7862-  
845 5\_1
- 846 15 Fledrich R, Stassart RM, Sereda MW (2012) Murine therapeutic models for Charcot-  
847 Marie-Tooth (CMT) disease. *British medical bulletin* 102: 89-113 Doi  
848 10.1093/bmb/lds010
- 849 16 Florio F, Ferri C, Scapin C, Feltri ML, Wrabetz L, D'Antonio M (2018) Sustained Expression  
850 of Negative Regulators of Myelination Protects Schwann Cells from Dysmyelination in a  
851 Charcot-Marie-Tooth 1B Mouse Model. *The Journal of neuroscience : the official journal*  
852 *of the Society for Neuroscience* 38: 4275-4287 Doi 10.1523/JNEUROSCI.0201-18.2018
- 853 17 Fortun J, Go JC, Li J, Amici SA, Dunn WA, Jr., Notterpek L (2006) Alterations in  
854 degradative pathways and protein aggregation in a neuropathy model based on PMP22  
855 overexpression. *Neurobiology of disease* 22: 153-164 Doi 10.1016/j.nbd.2005.10.010
- 856 18 Fridman V, Bundy B, Reilly MM, Pareyson D, Bacon C, Burns J, Day J, Feely S, Finkel RS,  
857 Grider Tet al (2015) CMT subtypes and disease burden in patients enrolled in the  
858 Inherited Neuropathies Consortium natural history study: a cross-sectional analysis.  
859 *Journal of neurology, neurosurgery, and psychiatry* 86: 873-878 Doi 10.1136/jnnp-2014-  
860 308826
- 861 19 Gabriel JM, Erne B, Pareyson D, Sghirlanzoni A, Taroni F, Steck AJ (1997) Gene dosage  
862 effects in hereditary peripheral neuropathy. Expression of peripheral myelin protein 22  
863 in Charcot-Marie-Tooth disease type 1A and hereditary neuropathy with liability to  
864 pressure palsies nerve biopsies. *Neurology* 49: 1635-1640
- 865 20 Gautier B, Hajjar H, Soares S, Berthelot J, Deck M, Abbou S, Campbell G, Ceprian M,  
866 Gonzalez S, Fovet C Met al (2021) AAV2/9-mediated silencing of PMP22 prevents the  
867 development of pathological features in a rat model of Charcot-Marie-Tooth disease 1 A.  
868 *Nature communications* 12: 2356 Doi 10.1038/s41467-021-22593-3

- 869 21 Grandis M, Vigo T, Passalacqua M, Jain M, Scazzola S, La Padula V, Brucal M, Benvenuto  
870 F, Nobbio L, Cadoni A et al (2008) Different cellular and molecular mechanisms for early  
871 and late-onset myelin protein zero mutations. *Human molecular genetics* 17: 1877-1889  
872 Doi 10.1093/hmg/ddn083
- 873 22 Greenfield S, Brostoff S, Eylar EH, Morell P (1973) Protein composition of myelin of the  
874 peripheral nervous system. *Journal of neurochemistry* 20: 1207-1216.
- 875 23 Ha N, Choi YI, Jung N, Song JY, Bae DK, Kim MC, Lee YJ, Song H, Kwak G, Jeong S et al  
876 (2020) A novel histone deacetylase 6 inhibitor improves myelination of Schwann cells in  
877 a model of Charcot-Marie-Tooth disease type 1A. *British journal of pharmacology* 177:  
878 5096-5113 Doi 10.1111/bph.15231
- 879 24 Hantke J, Carty L, Wagstaff LJ, Turmaine M, Wilton DK, Quintes S, Koltzenburg M, Baas F,  
880 Mirsky R, Jessen KR (2014) c-Jun activation in Schwann cells protects against loss of  
881 sensory axons in inherited neuropathy. *Brain* 137: 2922-2937 Doi  
882 10.1093/brain/awu257
- 883 25 Harding HP, Zhang Y, Bertolotti A, Zeng H, Ron D (2000) Perk is essential for translational  
884 regulation and cell survival during the unfolded protein response. *Mol Cell* 5: 897-904
- 885 26 Hayasaka K, Ohnishi A, Takada G, Fukushima Y, Murai Y (1993) Mutation of the myelin  
886 P0 gene in Charcot-Marie-tooth neuropathy type 1. *Biochemical and biophysical  
887 research communications* 194: 1317-1322 Doi S0006291X83719686
- 888 27 Hirt N, Eggermann K, Hyrenbach S, Lambeck J, Busche A, Fischer J, Rudnik-Schoneborn S,  
889 Gaspar H (2015) Genetic dosage compensation via co-occurrence of PMP22 duplication  
890 and PMP22 deletion. *Neurology* 84: 1605-1606 Doi 10.1212/WNL.0000000000001470
- 891 28 Howard P, Feely SME, Grider T, Bacha A, Scarlato M, Fazio R, Quattrini A, Shy ME,  
892 Previtali SC (2021) Loss of Function MPZ Mutation causes milder CMT1B Neuropathy.  
893 *Journal of the peripheral nervous system : JPNS*: Doi 10.1111/jns.12452
- 894 29 Huxley C, Passage E, Manson A, Putzu G, Figarella-Branger D, Pellissier JF, Fontes M  
895 (1996) Construction of a mouse model of Charcot-Marie-Tooth disease type 1A by  
896 pronuclear injection of human YAC DNA. *Human molecular genetics* 5: 563-569 Doi  
897 5d0403
- 898 30 Huxley C, Passage E, Robertson AM, Youl B, Huston S, Manson A, Saberan-Djoniedi D,  
899 Figarella-Branger D, Pellissier JF, Thomas PK et al (1998) Correlation between varying  
900 levels of PMP22 expression and the degree of demyelination and reduction in nerve  
901 conduction velocity in transgenic mice. *Human molecular genetics* 7: 449-458
- 902 31 Katona I, Wu X, Feely SM, Sottile S, Siskind CE, Miller LJ, Shy ME, Li J (2009) PMP22  
903 expression in dermal nerve myelin from patients with CMT1A. *Brain* 132: 1734-1740 Doi  
904 10.1093/brain/awp113
- 905 32 Khajavi M, Inoue K, Wiszniewski W, Ohyama T, Snipes GJ, Lupski JR (2005) Curcumin  
906 treatment abrogates endoplasmic reticulum retention and aggregation-induced  
907 apoptosis associated with neuropathy-causing myelin protein zero-truncating mutants.  
908 *American journal of human genetics* 77: 841-850 Doi 10.1086/497541
- 909 33 Khajavi M, Shiga K, Wiszniewski W, He F, Shaw CA, Yan J, Wensel TG, Snipes GJ, Lupski JR  
910 (2007) Oral curcumin mitigates the clinical and neuropathologic phenotype of the  
911 Trembler-J mouse: a potential therapy for inherited neuropathy. *American journal of  
912 human genetics* 81: 438-453 Doi 10.1086/519926

- 913 34 Kimura J (2005) Nerve conduction and electromyography. In: Dyck P.J., Thomas PK (eds)  
914 Peripheral Neuropathy. Elsevier/Saunders, City, pp 899-970
- 915 35 Lee S, Bazick H, Chittoor-Vinod V, Al Salihi MO, Xia G, Notterpek L (2018) Elevated  
916 Peripheral Myelin Protein 22, Reduced Mitotic Potential, and Proteasome Impairment in  
917 Dermal Fibroblasts from Charcot-Marie-Tooth Disease Type 1A Patients. *The American*  
918 *journal of pathology* 188: 728-738 Doi 10.1016/j.ajpath.2017.10.021
- 919 36 Lemke G, Axel R (1985) Isolation and sequence of a cDNA encoding the major structural  
920 protein of peripheral myelin. *Cell* 40: 501-508.
- 921 37 Li J, Bai Y, Ghandour K, Qin P, Grandis M, Trostinskaia A, Ianakova E, Wu X, Schenone A,  
922 Vallat JMet al (2005) Skin biopsies in myelin-related neuropathies: bringing molecular  
923 pathology to the bedside. *Brain* 128: 1168-1177.
- 924 38 Lin JH, Li H, Zhang Y, Ron D, Walter P (2009) Divergent effects of PERK and IRE1 signaling  
925 on cell viability. *PloS one* 4: e4170 Doi 10.1371/journal.pone.0004170
- 926 39 Lupski JR, de Oca-Luna RM, Slaugenhaupt S, Pentao L, Guzzetta V, Trask BJ, Saucedo-  
927 Cardenas O, Barker DF, Killian JM, Garcia CAet al (1991) DNA duplication associated with  
928 Charcot-Marie-Tooth disease type 1A. *Cell* 66: 219-232 Doi 0092-8674(91)90613-4
- 929 40 Marinko JT, Carter BD, Sanders CR (2020) Direct relationship between increased  
930 expression and mistrafficking of the Charcot-Marie-Tooth-associated protein PMP22.  
931 *The Journal of biological chemistry* 295: 11963-11970 Doi 10.1074/jbc.AC120.014940
- 932 41 Miller LJ, Patzko A, Lewis RA, Shy ME (2012) Phenotypic presentation of the Ser63Del  
933 MPZ mutation. *Journal of the peripheral nervous system : JPNS* 17: 197-200 Doi  
934 10.1111/j.1529-8027.2012.00398.x
- 935 42 Monk KR, Feltri ML, Taveggia C (2015) New insights on Schwann cell development. *Glia*  
936 63: 1376-1393 Doi 10.1002/glia.22852
- 937 43 Murphy SM, Laura M, Fawcett K, Pandraud A, Liu YT, Davidson GL, Rossor AM, Polke JM,  
938 Castleman V, Manji Het al (2012) Charcot-Marie-Tooth disease: frequency of genetic  
939 subtypes and guidelines for genetic testing. *Journal of neurology, neurosurgery, and*  
940 *psychiatry* 83: 706-710 Doi 10.1136/jnnp-2012-302451
- 941 44 Nave KA (2010) Myelination and support of axonal integrity by glia. *Nature* 468: 244-252  
942 Doi 10.1038/nature09614
- 943 45 Notterpek L, Ryan MC, Tobler AR, Shooter EM (1999) PMP22 accumulation in  
944 aggresomes: implications for CMT1A pathology. *Neurobiology of disease* 6: 450-460 Doi  
945 10.1006/nbdi.1999.0274
- 946 46 Okamoto Y, Pehlivan D, Wiszniewski W, Beck CR, Snipes GJ, Lupski JR, Khajavi M (2013)  
947 Curcumin facilitates a transitory cellular stress response in Trembler-J mice. *Human*  
948 *molecular genetics* 22: 4698-4705 Doi 10.1093/hmg/ddt318
- 949 47 Pantera H, Shy ME, Svaren J (2020) Regulating PMP22 expression as a dosage sensitive  
950 neuropathy gene. *Brain research* 1726: 146491 Doi 10.1016/j.brainres.2019.146491
- 951 48 Pareek S, Notterpek L, Snipes GJ, Naef R, Sossin W, Laliberte J, Iacampo S, Suter U,  
952 Shooter EM, Murphy RA (1997) Neurons promote the translocation of peripheral myelin  
953 protein 22 into myelin. *The Journal of neuroscience : the official journal of the Society*  
954 *for Neuroscience* 17: 7754-7762.

- 955 49 Pareek S, Suter U, Snipes GJ, Welcher AA, Shooter EM, Murphy RA (1993) Detection and  
956 processing of peripheral myelin protein PMP22 in cultured Schwann cells. *The Journal of*  
957 *biological chemistry* 268: 10372-10379
- 958 50 Parkinson DB, Bhaskaran A, Arthur-Farraj P, Noon LA, Woodhoo A, Lloyd AC, Feltri ML,  
959 Wrabetz L, Behrens A, Mirsky Ret al (2008) c-Jun is a negative regulator of myelination.  
960 *The Journal of cell biology* 181: 625-637 Doi 10.1083/jcb.200803013
- 961 51 Passage E, Norreel JC, Noack-Fraissignes P, Sanguedolce V, Pizant J, Thirion X, Robaglia-  
962 Schlupp A, Pellissier JF, Fontes M (2004) Ascorbic acid treatment corrects the phenotype  
963 of a mouse model of Charcot-Marie-Tooth disease. *Nature medicine* 10: 396-401 Doi  
964 10.1038/nm1023
- 965 52 Patzko A, Bai Y, Saporta MA, Katona I, Wu X, Vizzuso D, Feltri ML, Wang S, Dillon LM,  
966 Kamholz Jet al (2012) Curcumin derivatives promote Schwann cell differentiation and  
967 improve neuropathy in R98C CMT1B mice. *Brain* 135: 3551-3566 Doi  
968 10.1093/brain/aws299
- 969 53 Pennuto M, Tinelli E, Malaguti M, Del Carro U, D'Antonio M, Ron D, Quattrini A, Feltri  
970 ML, Wrabetz L (2008) Ablation of the UPR-Mediator CHOP Restores Motor Function and  
971 Reduces Demyelination in Charcot-Marie-Tooth 1B Mice. *Neuron* 57: 393-405 Doi  
972 10.1016/j.neuron.2007.12.021
- 973 54 Perea J, Robertson A, Tolmachova T, Muddle J, King RH, Ponsford S, Thomas PK, Huxley  
974 C (2001) Induced myelination and demyelination in a conditional mouse model of  
975 Charcot-Marie-Tooth disease type 1A. *Human molecular genetics* 10: 1007-1018
- 976 55 Sanmaneechai O, Feely S, Scherer SS, Herrmann DN, Burns J, Muntoni F, Li J, Siskind CE,  
977 Day JW, Laura Met al (2015) Genotype-phenotype characteristics and baseline natural  
978 history of heritable neuropathies caused by mutations in the MPZ gene. *Brain* 138:  
979 3180-3192 Doi 10.1093/brain/awv241
- 980 56 Saporta MA, Shy BR, Patzko A, Bai Y, Pennuto M, Ferri C, Tinelli E, Saveri P, Kirschner D,  
981 Crowther Met al (2012) MpzR98C arrests Schwann cell development in a mouse model  
982 of early-onset Charcot-Marie-Tooth disease type 1B. *Brain* 135: 2032-2047 Doi  
983 10.1093/brain/aws140
- 984 57 Schleich JP, Peng D, Kroncke BM, Mittendorf KF, Narayan M, Carter BD, Sanders CR  
985 (2013) Reversible folding of human peripheral myelin protein 22, a tetraspan membrane  
986 protein. *Biochemistry* 52: 3229-3241 Doi 10.1021/bi301635f
- 987 58 Sereda M, Griffiths I, Puhlhofer A, Stewart H, Rossner MJ, Zimmerman F, Magyar JP,  
988 Schneider A, Hund E, Meinck H Met al (1996) A transgenic rat model of Charcot-Marie-  
989 Tooth disease. *Neuron* 16: 1049-1060
- 990 59 Shapiro L, Doyle JP, Hensley P, Colman DR, Hendrickson WA (1996) Crystal structure of  
991 the extracellular domain from P0, the major structural protein of peripheral nerve  
992 myelin. *Neuron* 17: 435-449.
- 993 60 Skre H (1974) Genetic and clinical aspects of Charcot-Marie-Tooth's disease. *Clinical*  
994 *genetics* 6: 98-118
- 995 61 Takeo T, Nakagata N (2011) Reduced glutathione enhances fertility of frozen/thawed  
996 C57BL/6 mouse sperm after exposure to methyl-beta-cyclodextrin. *Biology of*  
997 *reproduction* 85: 1066-1072 Doi 10.1095/biolreprod.111.092536



- 998 62 Taveggia C, Zanazzi G, Petrylak A, Yano H, Rosenbluth J, Einheber S, Xu X, Esper RM,  
999 Loeb JA, Shrager Pet al (2005) Neuregulin-1 type III determines the ensheathment fate  
1000 of axons. *Neuron* 47: 681-694 Doi 10.1016/j.neuron.2005.08.017
- 1001 63 Timmerman V, Nelis E, Van Hul W, Nieuwenhuijsen BW, Chen KL, Wang S, Ben Othman  
1002 K, Cullen B, Leach RJ, Hanemann CO et al (1992) The peripheral myelin protein gene  
1003 PMP-22 is contained within the Charcot-Marie-Tooth disease type 1A duplication.  
1004 *Nature genetics* 1: 171-175 Doi 10.1038/ng0692-171
- 1005 64 Vallat JM, Sindou P, Preux PM, Tabaraud F, Milor AM, Couratier P, LeGuern E, Brice A  
1006 (1996) Ultrastructural PMP22 expression in inherited demyelinating neuropathies.  
1007 *Annals of neurology* 39: 813-817.
- 1008 65 Verhamme C, King RH, ten Asbroek AL, Muddle JR, Nourallah M, Wolterman R, Baas F,  
1009 van Schaik IN (2011) Myelin and axon pathology in a long-term study of PMP22-  
1010 overexpressing mice. *Journal of neuropathology and experimental neurology* 70: 386-  
1011 398 Doi 10.1097/NEN.0b013e318217eba0
- 1012 66 VerPlank JJS, Gawron J, Silvestri NJ, Feltri ML, Wrabetz L, Goldberg AL (2021) Raising  
1013 cGMP restores proteasome function and myelination in mice with a proteotoxic  
1014 neuropathy. *Brain*: Doi 10.1093/brain/awab249
- 1015 67 VerPlank JJS, Lokireddy S, Feltri ML, Goldberg AL, Wrabetz L (2018) Impairment of  
1016 protein degradation and proteasome function in hereditary neuropathies. *Glia* 66: 379-  
1017 395 Doi 10.1002/glia.23251
- 1018 68 Volpi VG, Ferri C, Fregno I, Del Carro U, Bianchi F, Scapin C, Pettinato E, Solda T, Feltri  
1019 ML, Molinari Met al (2019) Schwann cells ER-associated degradation contributes to  
1020 myelin maintenance in adult nerves and limits demyelination in CMT1B mice. *PLoS*  
1021 *genetics* 15: e1008069 Doi 10.1371/journal.pgen.1008069
- 1022 69 Volpi VG, Touvier T, D'Antonio M (2017) Endoplasmic Reticulum Protein Quality Control  
1023 Failure in Myelin Disorders. *Front Mol Neurosci* 9: 162 Doi 10.3389/fnmol.2016.00162
- 1024 70 Wrabetz L, D'Antonio M, Pennuto M, Dati G, Tinelli E, Fratta P, Previtali S, Imperiale D,  
1025 Zielasek J, Toyka Ket al (2006) Different intracellular pathomechanisms produce diverse  
1026 Myelin Protein Zero neuropathies in transgenic mice. *The Journal of neuroscience : the*  
1027 *official journal of the Society for Neuroscience* 26: 2358-2368 Doi  
1028 10.1523/JNEUROSCI.3819-05.2006
- 1029 71 Wrabetz L, Feltri ML, Quattrini A, Imperiale D, Previtali S, D'Antonio M, Martini R, Yin X,  
1030 Trapp BD, Zhou Let al (2000) P(0) glycoprotein overexpression causes congenital  
1031 hypomyelination of peripheral nerves. *J Cell Biol* 148: 1021-1034
- 1032 72 Wu S, Stone S, Yue Y, Lin W (2021) Endoplasmic reticulum associated degradation is  
1033 required for maintaining endoplasmic reticulum homeostasis and viability of mature  
1034 Schwann cells in adults. *Glia* 69: 489-506 Doi 10.1002/glia.23910
- 1035 73 Zhao HT, Damle S, Ikeda-Lee K, Kuntz S, Li J, Mohan A, Kim A, Hung G, Scheideler MA,  
1036 Scherer SSet al (2018) PMP22 antisense oligonucleotides reverse Charcot-Marie-Tooth  
1037 disease type 1A features in rodent models. *The Journal of clinical investigation* 128: 359-  
1038 368 Doi 10.1172/JCI96499
- 1039

1040

1041

1042

1043

1044

1045

1046

1047

1048

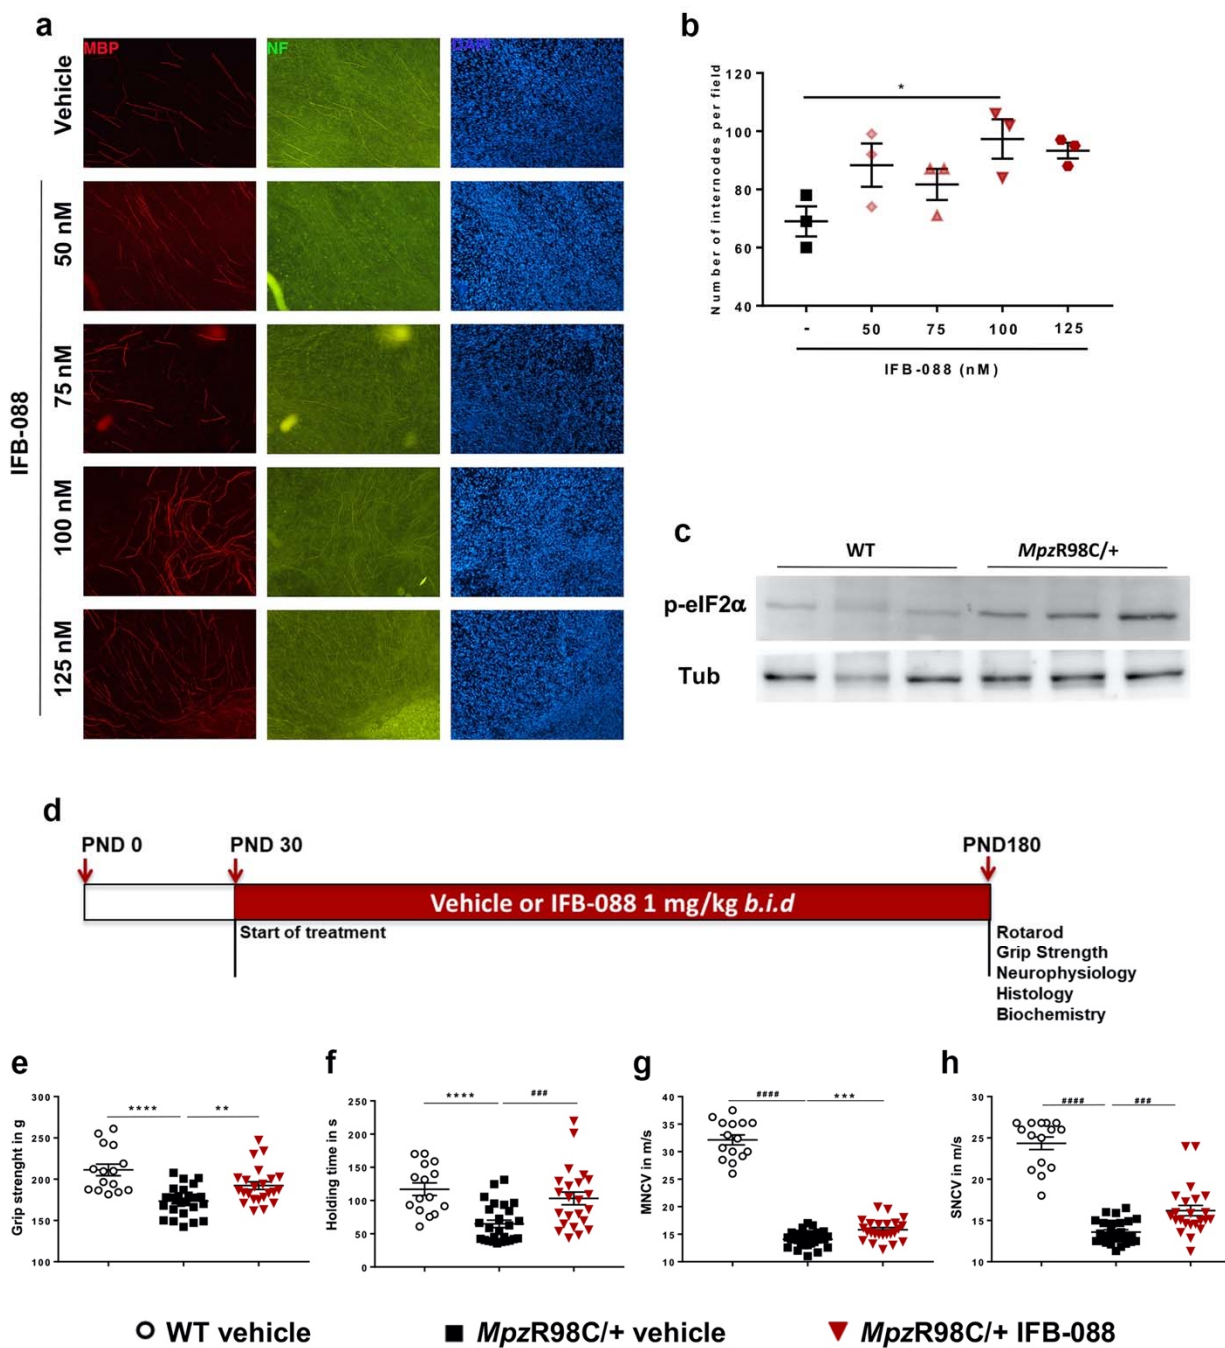

Figure 1

1049

1050

1051

1052

1053

1054

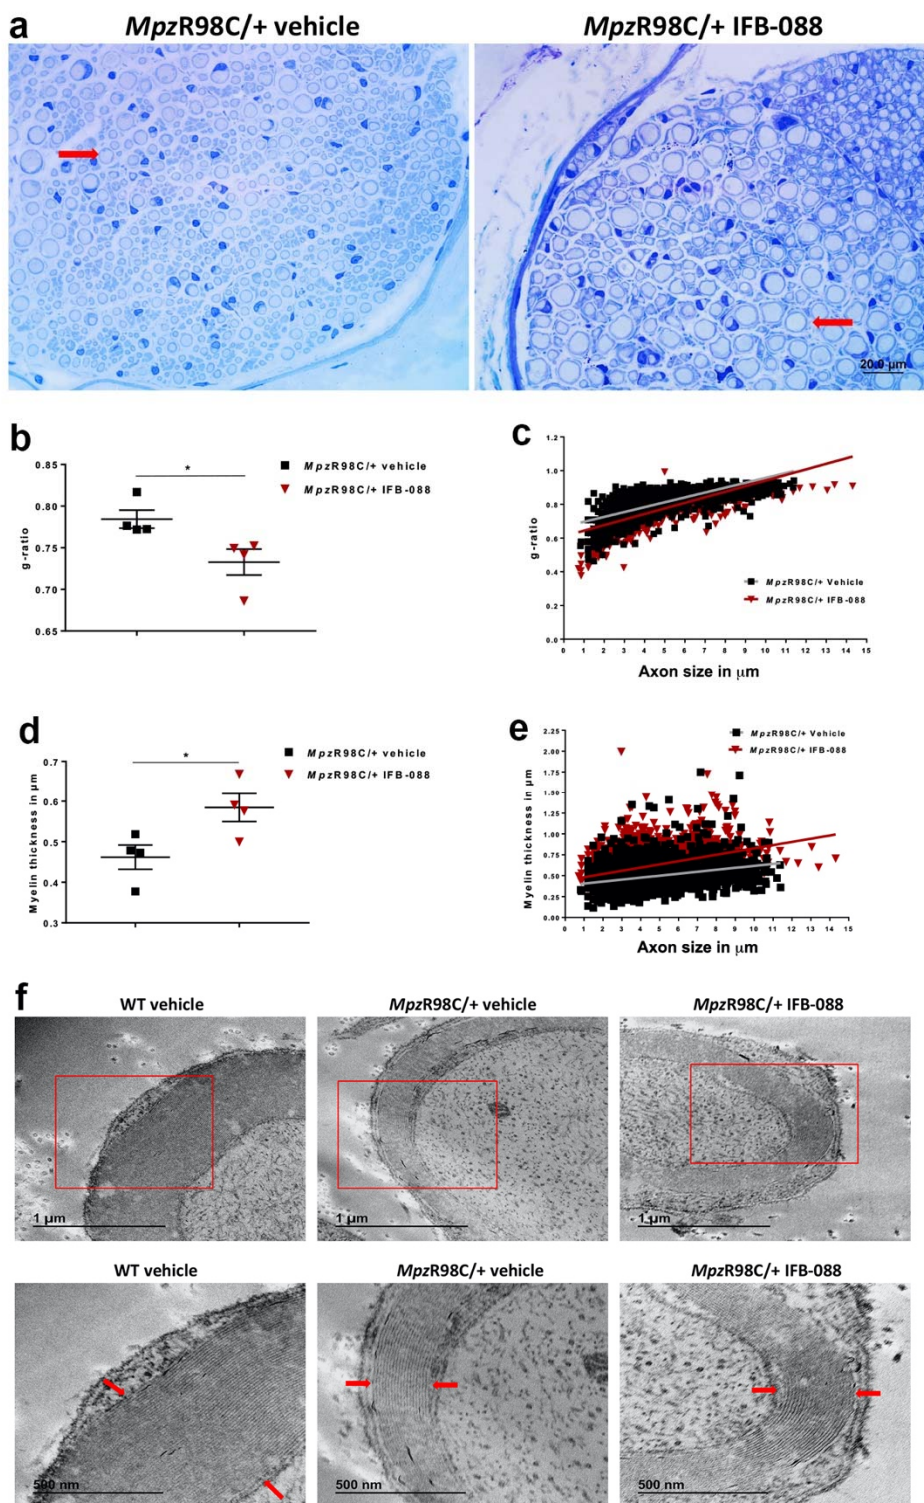

1055

Figure 2

1056

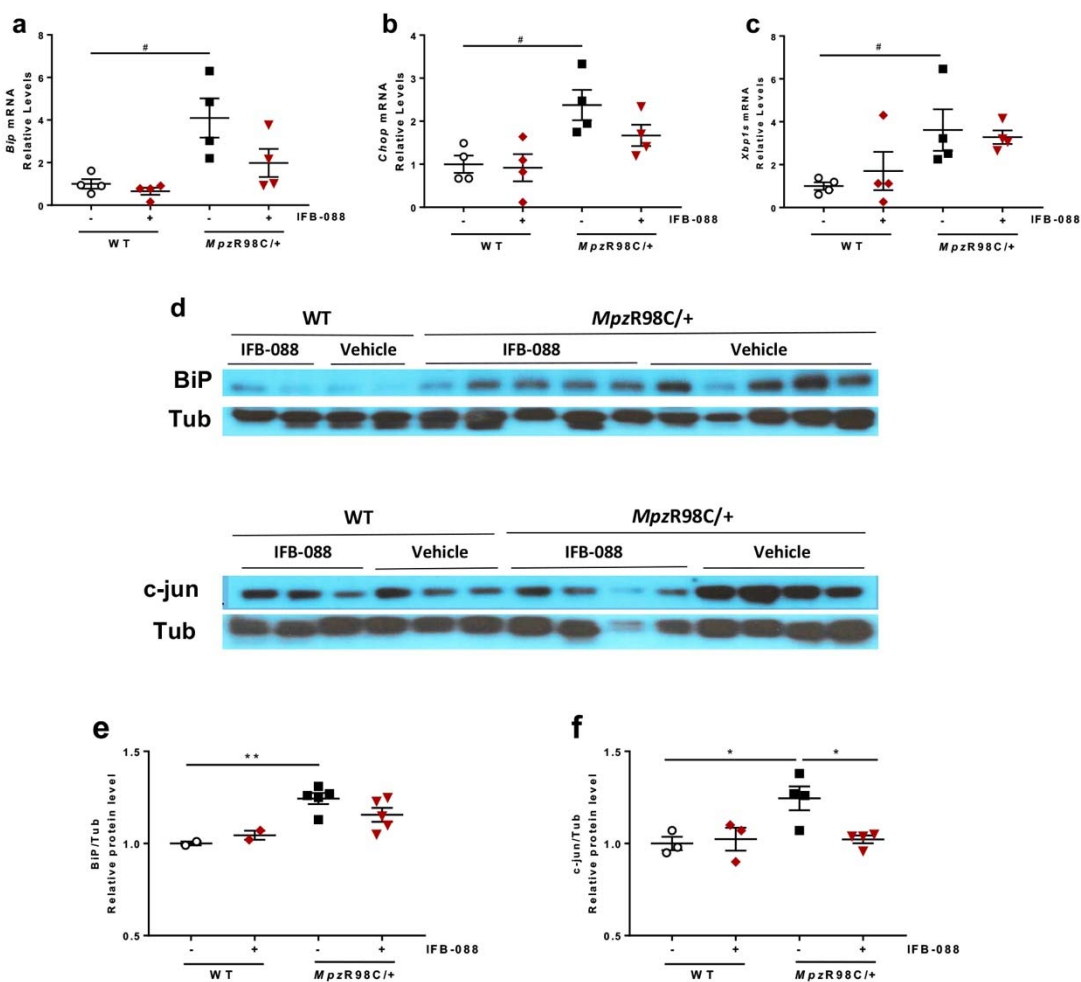

Figure 3

1057

1058

1059

1060

1061

1062

1063

1064

1065

1066

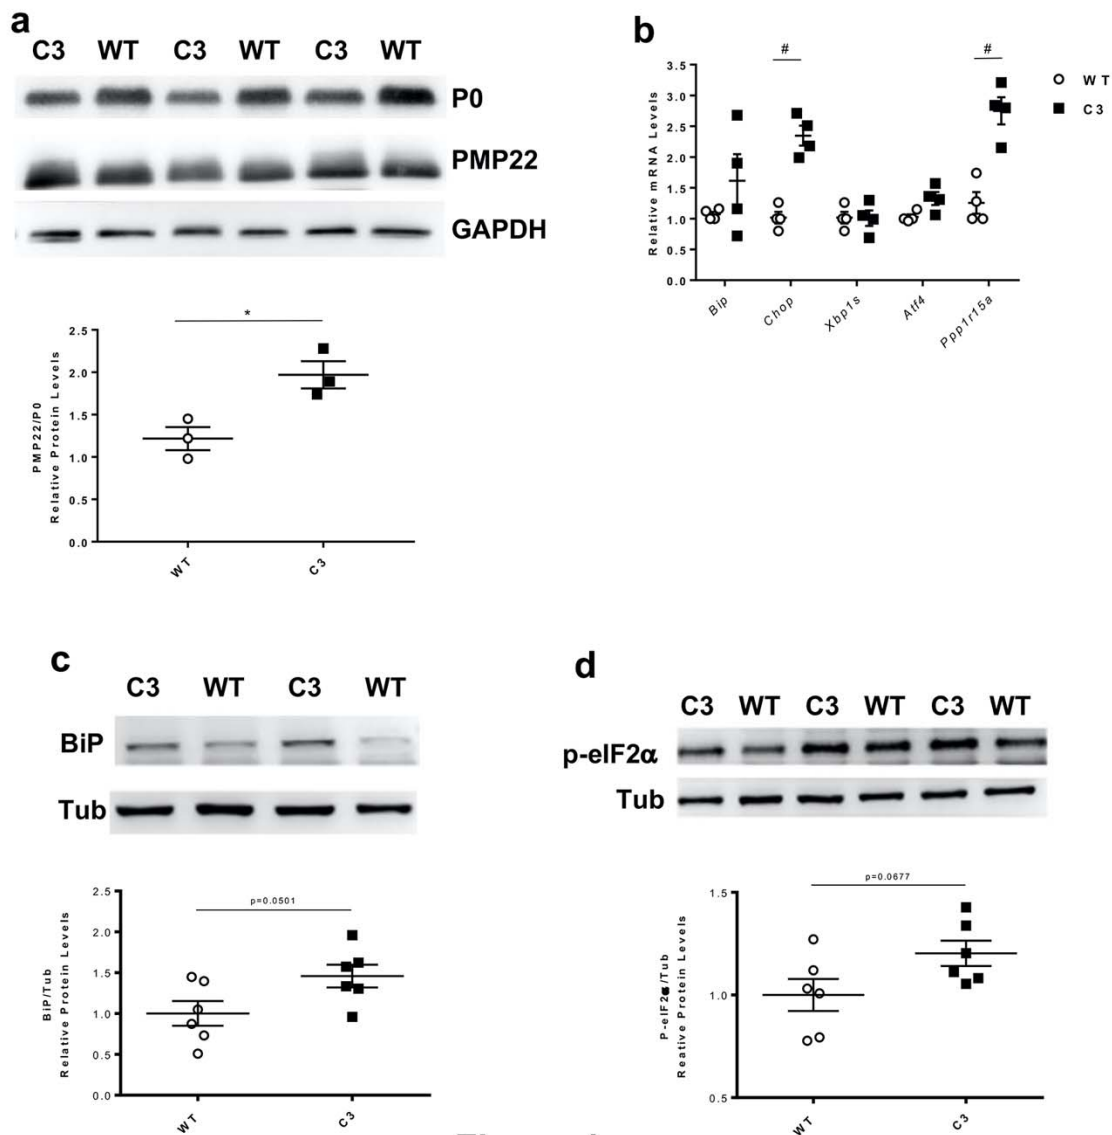

Figure 4

1067

1068

1069

1070

1071

1072

1073



1074

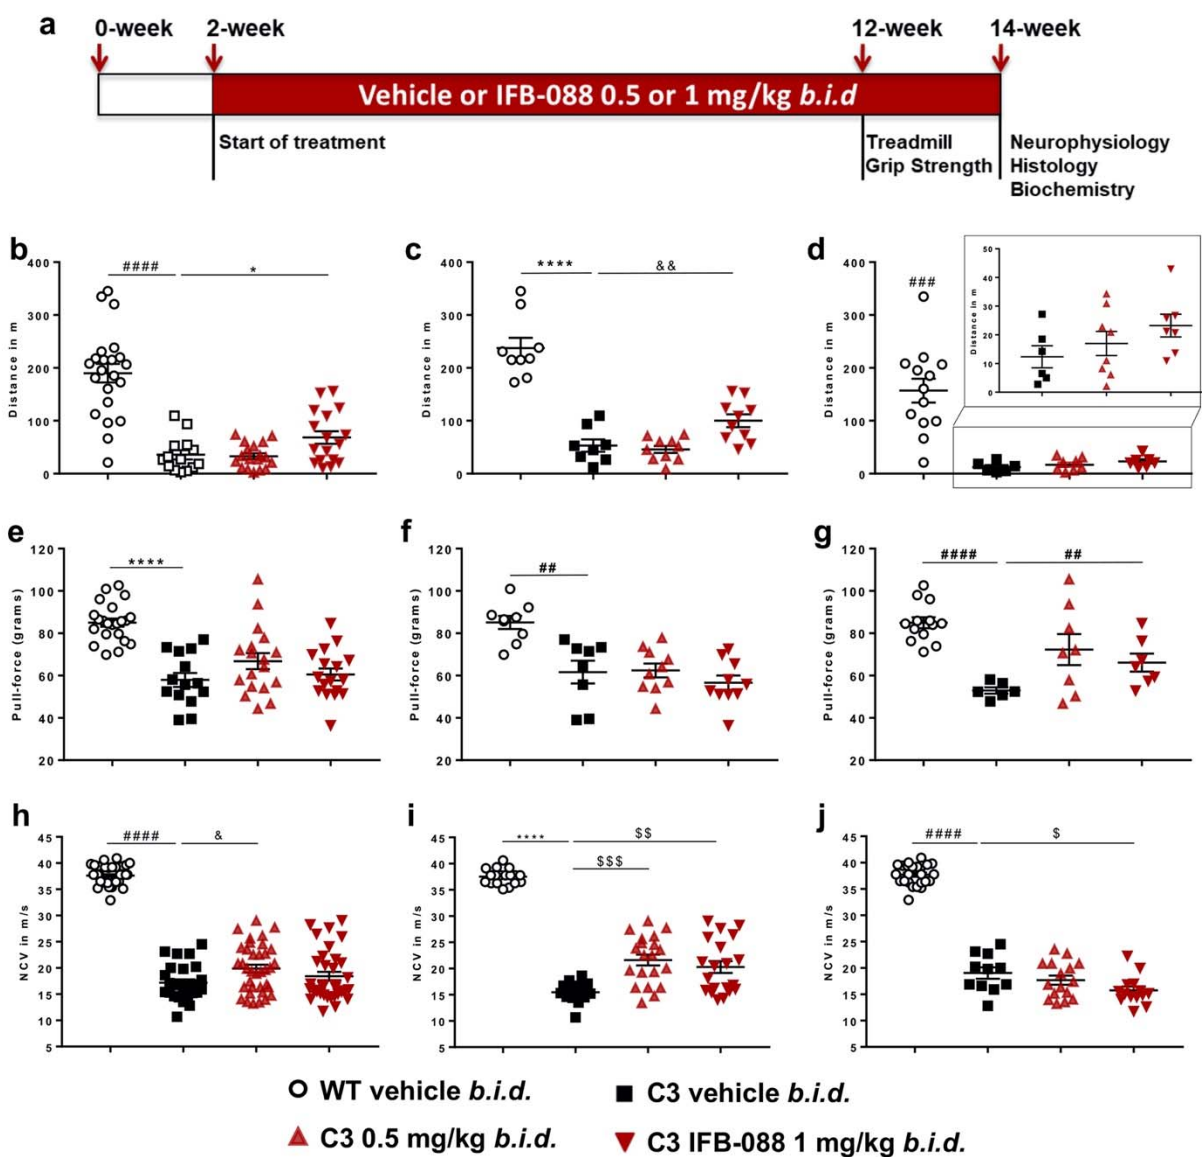

Figure 5

1075

1076

1077

1078

1079

1080

1081

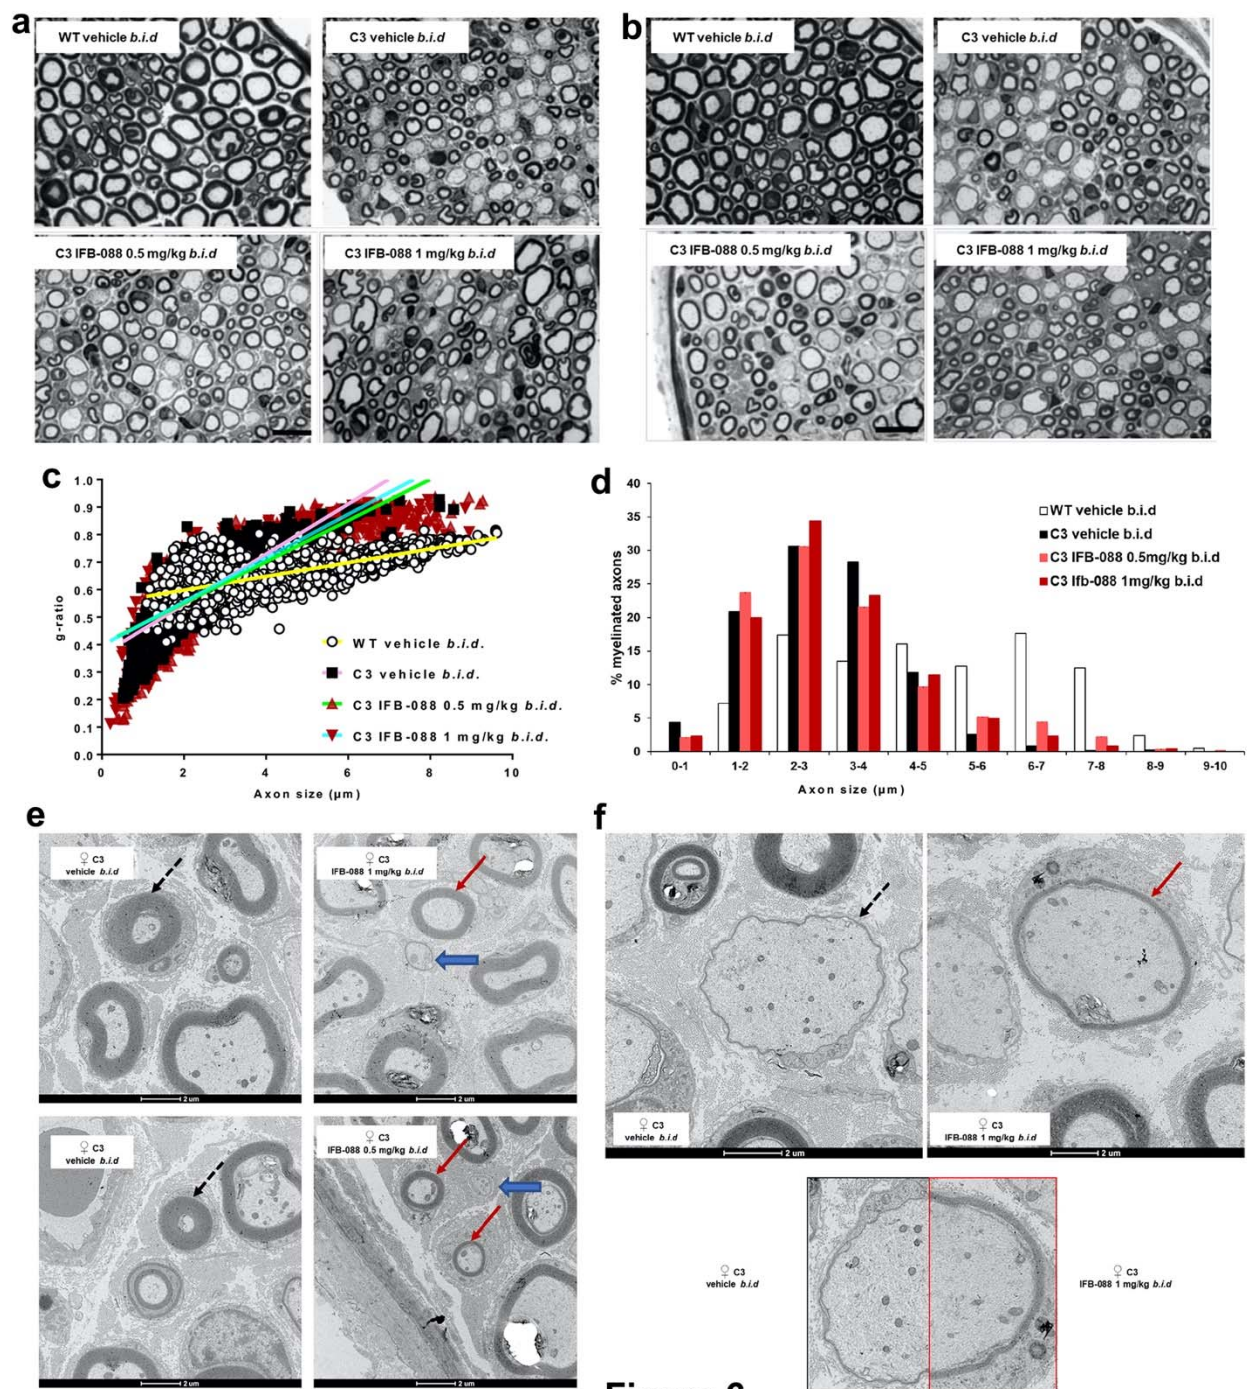

**Figure 6**

1082

1083

1084

1085

1086



1087

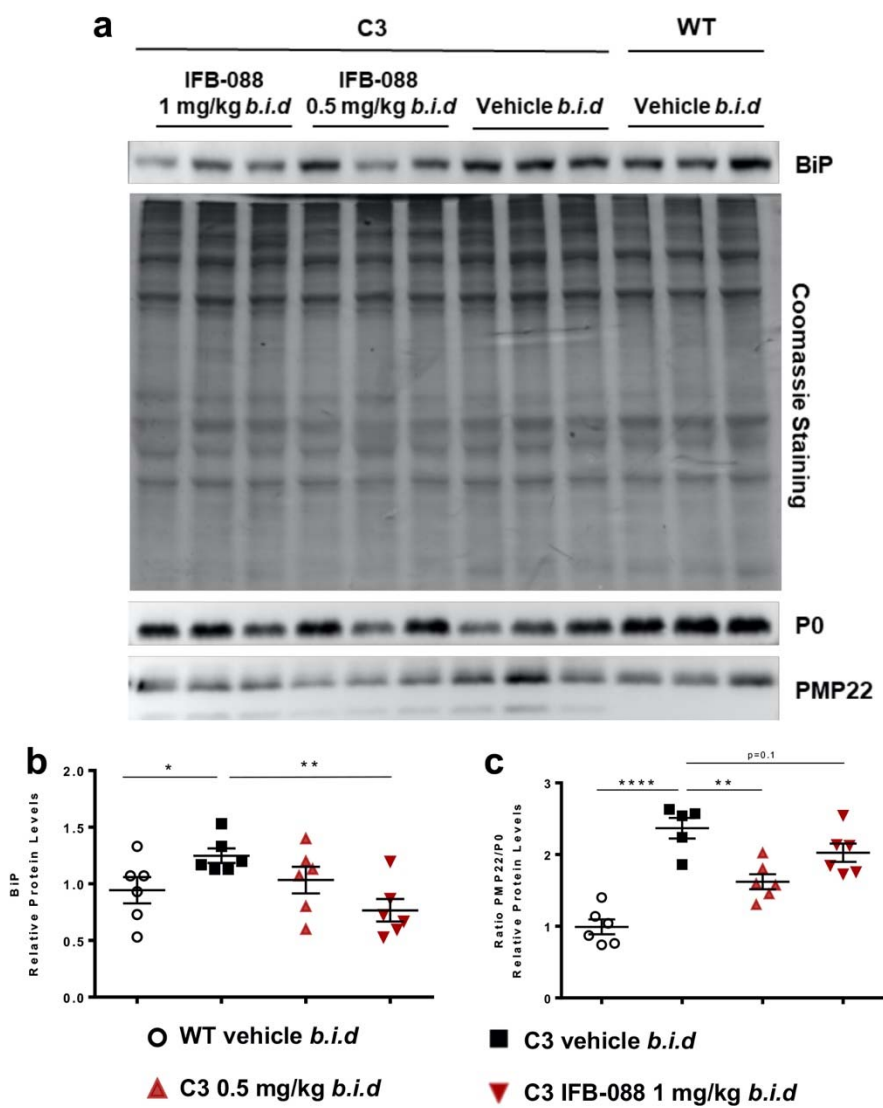

1088

**Figure 7**
